# Supplementary material
Source: PubMed Central journal article supplement (PMC4326706)
Supplement: ejhg2014110x1.pdf [file ejhg2014110x1.pdf]

## SUPPLEMENTAL MATERIAL

A genome-wide association study identifies *PLCL2* and *AP3D1-DOT1L-SF3A2* as new susceptibility loci for myocardial infarction in Japanese

Megumi Hirokawa, Hiroyuki Morita, Tomoyuki Tajima, Atsushi Takahashi, Kyota Ashikawa, Fuyuki Miya, Daichi Shigemizu, Kouichi Ozaki, Yasuhiko Sakata, Daisaku Nakatani, Shinichiro Suna, Yasushi Imai, Toshihiro Tanaka, Tatsuhiko Tsunoda, Koichi Matsuda, Takashi Kadowaki, Yusuke Nakamura, Ryozo Nagai, Issei Komuro, and Michiaki Kubo
