# Supplementary material
Source: PubMed Central journal article supplement (PMC4326706)
Supplement: ejhg2014110x2.pdf [file ejhg2014110x2.pdf]

Figure S1

A

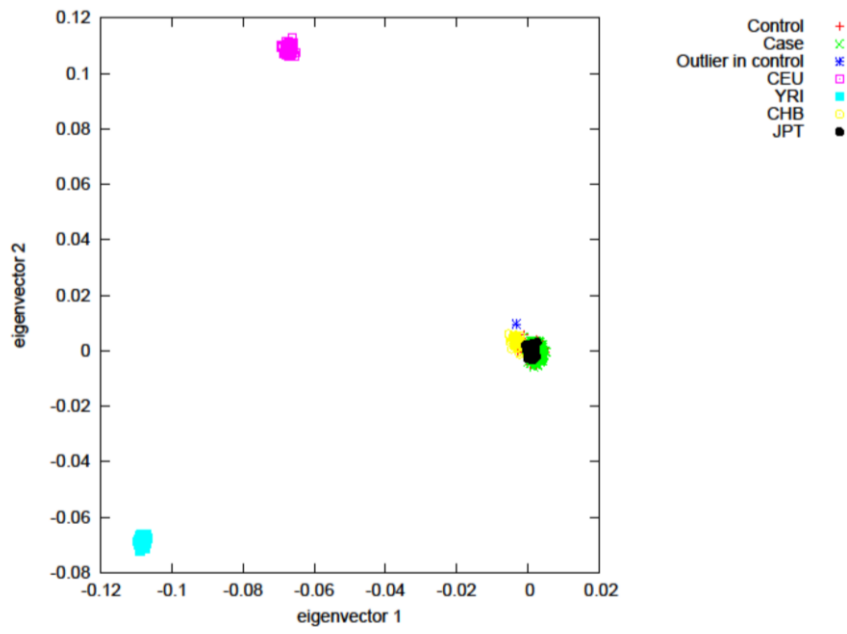

B

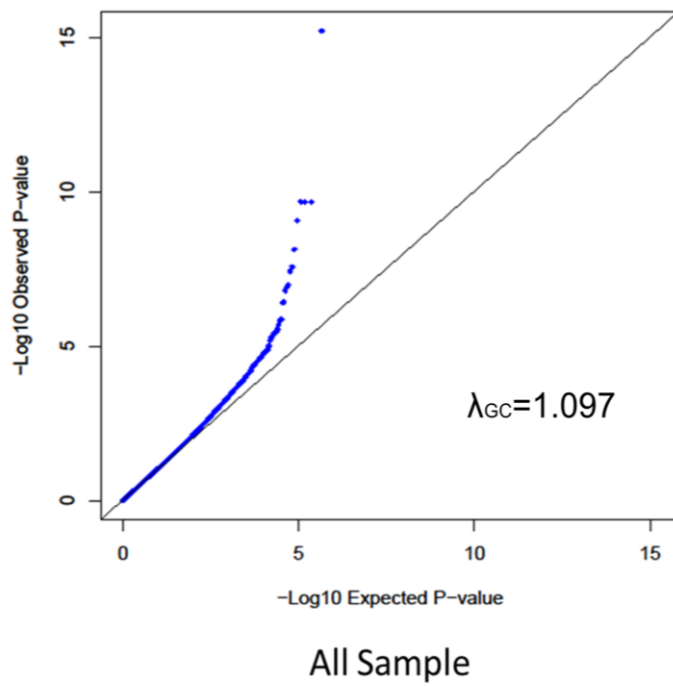

C

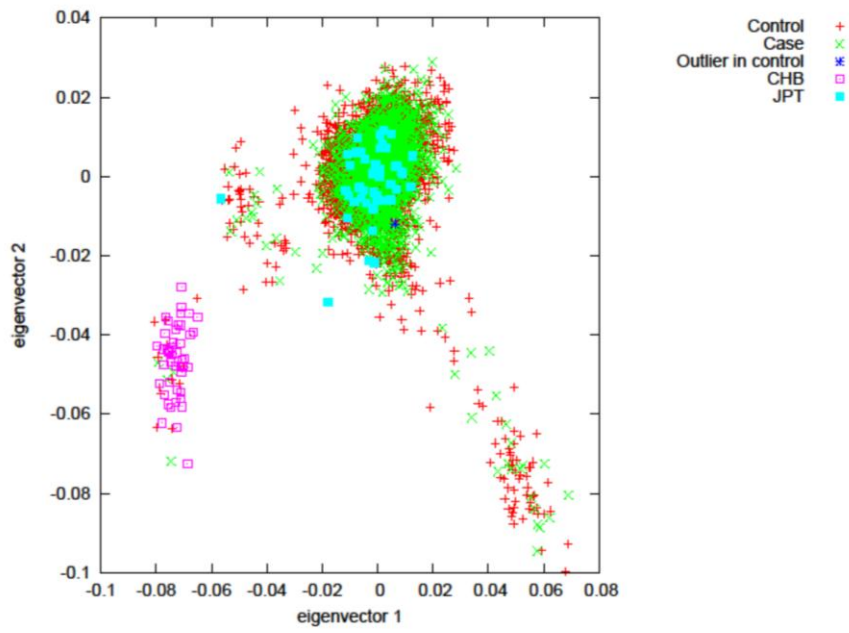

D

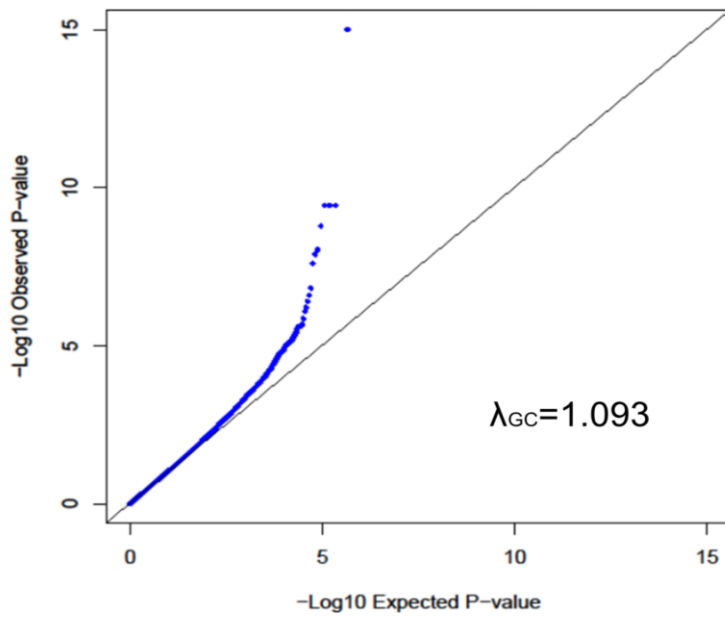

Hondo Sample

**E**

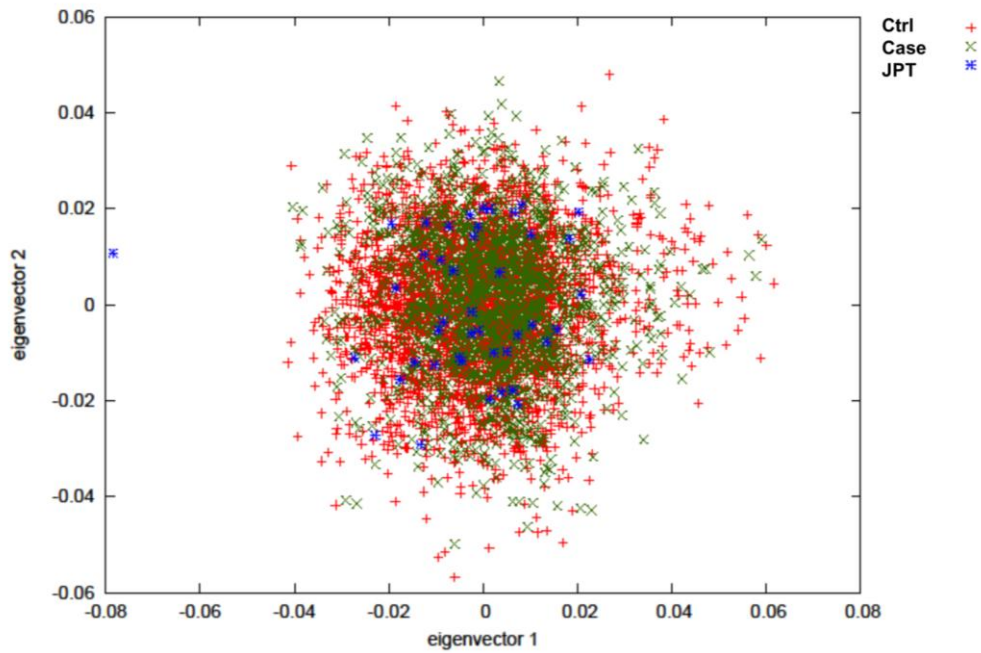

Figure S1.

Results of GWAS.

(A)(C)(E) Results of the principal component analysis (PCA) using HapMap four populations (CEU, YRI, JPT, CHB) as the references (A), using HapMap Asian population (JPT, CHB) as the references (C), and only using the main (Hondo) cluster and using HapMap Japanese population as the references (E).

(B)(D) Quantile-quantile (Q-Q) plots using all samples ( $\lambda_{GC} = 1.097$ ) (B), and only using the samples in the main (Hondo) cluster ( $\lambda_{GC} = 1.093$ ) (D).
