# Supplementary material
Source: PubMed Central journal article supplement (PMC4326706)
Supplement: ejhg2014110x3.pdf [file ejhg2014110x3.pdf]

Figure S2

A

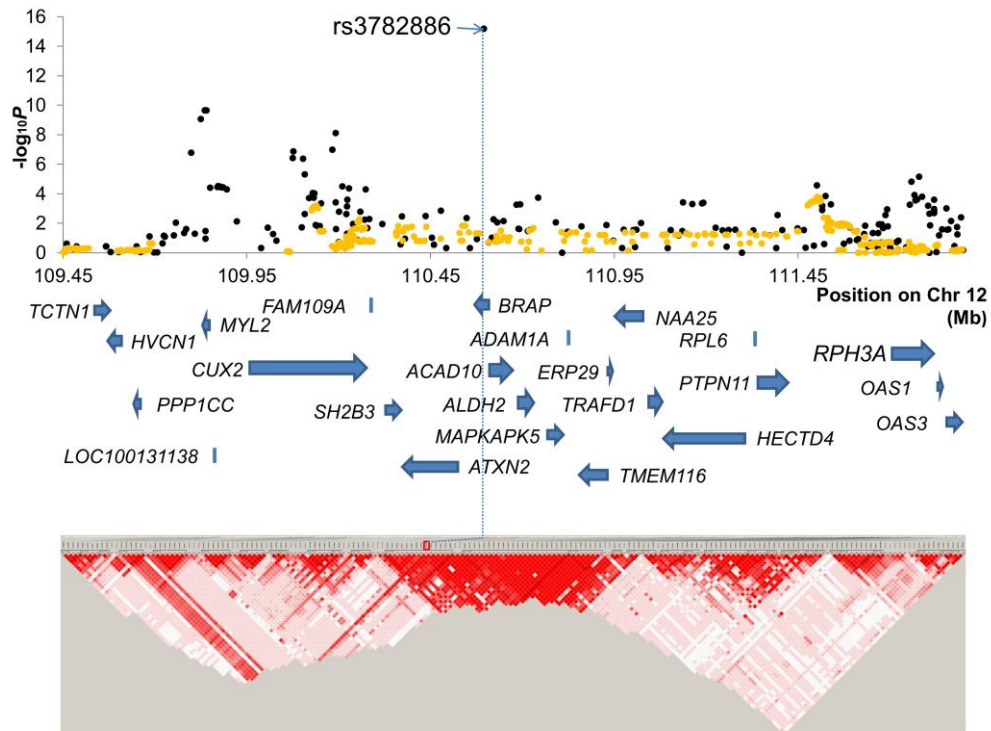

B

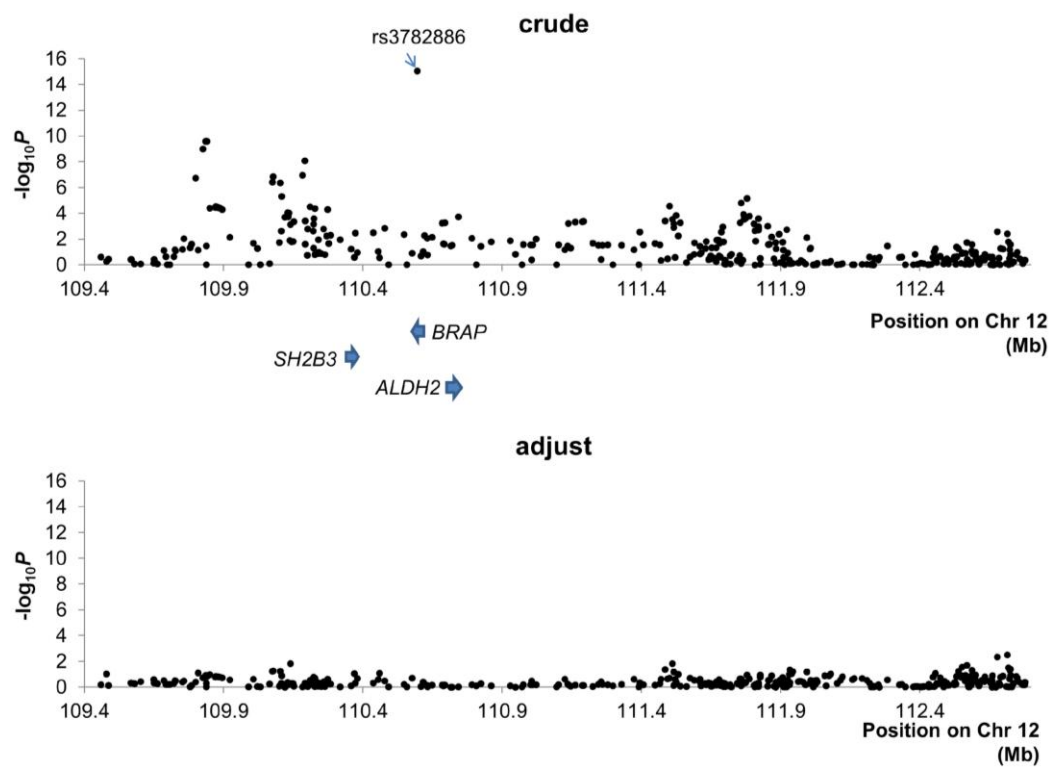

Figure S2  
Result of chromosome 12q24.

(A) Case-control association plots, LD map and genomic structure of 12q24.

Black dots represent  $-\log_{10}P$  obtained from GWAS samples. Orange dots represent  $-\log_{10}P$  obtained from imputation data. We drew the LD map based on  $D'$  values using the genotype data from the cases and controls in the GWAS samples. Arrows and lines indicate the location of genes. (B)  $P$  values for association results of GWAS and logistic regression analysis of 12q24 before and after adjustment for rs3782886. Arrows indicate the location of genes. *BRAP* and *ALDH2* were reported in Japanese GWAS<sup>10</sup>. *SH2B3* was reported in European GWAS<sup>14</sup>.
