# Supplementary material
Source: PubMed Central journal article supplement (PMC4326706)
Supplement: ejhg2014110x4.pdf [file ejhg2014110x4.pdf]

**Table S1 GWAS results for previously reported CAD or MI loci.**

| gene or locus             | SNP<br>(Previously reported ) | OR(95% CI)<br>(Previously reported ) | Chrloc      | Allele<br>(risk/non-risk) | Detection Power<br>of our GWAS | proxy SNP<br>(GWAS ) | $r^2$ | Chr | Chrloc      | MAF(case/ctrl)<br>(GWAS) | PGC<br>(GWAS) | OR(95%CI)<br>(GWAS) | Ref. |
|---------------------------|-------------------------------|--------------------------------------|-------------|---------------------------|--------------------------------|----------------------|-------|-----|-------------|--------------------------|---------------|---------------------|------|
| <i>PCSK9</i>              | rs11206510                    | 1.12 (1.02-1.23)                     | 55,268,627  | T/C                       | 37%                            | rs11206510           | 1     | 1   | 55,268,627  | 0.05/0.05                | 0.278         | 0.89 (0.73-1.09)    | 1    |
|                           |                               |                                      |             |                           |                                | rs2479394            | 0.09  | 1   | 55,258,652  | 0.31/0.33                | 0.0253        | 1.11(1.02-1.22)     |      |
| <i>PPAP2B</i>             | rs17114036                    | 1.16(1.10-1.22)                      | 56,735,409  | A/G                       | 55%                            | rs12070247           | 0.32  | 1   | 56,800,638  | 0.08/0.08                | 0.475         | 1.06 (0.91-1.24)    | 2    |
|                           |                               |                                      |             |                           |                                | rs7519268            | 0.02  | 1   | 56,776,398  | 0.24/0.21                | 2.59E-03      | 1.17(1.06-1.30)     |      |
| <i>CELSR2-PSRC1-SORT1</i> | rs646776                      | 1.11(1.02-1.22)                      | 109,620,053 | T/C                       | 54%                            | rs646776             | 1     | 1   | 109,620,053 | 0.06/0.08                | 5.51E-03      | 0.78 (0.66-0.92)    | 1    |
|                           |                               |                                      |             |                           |                                | rs611917             | 1     | 1   | 109,616,775 | 0.06/0.08                | 4.56E-03      | 0.78(0.65-0.92)     |      |
| <i>IL6R</i>               | rs4845625                     | 1.06, 1.04                           | 152,688,691 | T/C                       | 21%                            | rs4553185            | 0.95  | 1   | 152,677,579 | 0.49/0.48                | 0.0124        | 1.12 (1.03-1.21)    | 3    |
|                           |                               |                                      |             |                           |                                | rs4240872            | 0.3   | 1   | 152,702,819 | 0.20/0.17                | 4.26E-04      | 1.22(1.10-1.36)     |      |
| <i>MIA3</i>               | rs17465637                    | 1.23 (1.12-1.34)                     | 220,890,152 | C/A                       | 100%                           | rs6683071            | 0.15  | 1   | 220,989,974 | 0.15/0.16                | 0.311         | 1.06 (0.95-1.20)    | 4    |
|                           |                               |                                      |             |                           |                                | rs3008598            | 0.15  | 1   | 220,846,571 | 0.20/0.22                | 0.244075      | 1.07(0.96-1.18)     |      |
| <i>TTC32-WDR35</i>        | rs2123536                     | 1.25 (1.12–1.39)                     | 19,809,058  | T/C                       | 100%                           | rs16986997           | 0.74  | 2   | 19,815,862  | 0.49/0.49                | 0.699         | 0.98 (0.90-1.07)    | 5    |
|                           |                               |                                      |             |                           |                                | rs11096616           | 0.48  | 2   | 19,814,440  | 0.37/0.38                | 0.442         | 1.04(0.95-1.13)     |      |
| <i>APOB</i>               | rs515135                      | 1.07, 1.08                           | 21,139,562  | G/A                       | 28%                            | rs97458              | 0.65  | 2   | 21,181,140  | 0.16/0.16                | 0.959         | 1.00 (0.89-1.12)    | 3    |
|                           |                               |                                      |             |                           |                                | rs754523             | 0.04  | 2   | 21,165,196  | 0.21/0.22                | 0.156         | 0.93(0.84-1.02)     |      |
| <i>ABCG5-ABCG8</i>        | rs6544713                     | 1.06                                 | 43,927,385  | T/C                       | 18%                            | rs6544713            | 1     | 2   | 43,927,385  | 0.00030/0.00016          | 0.654         | 0.52 (0.03-8.33)    | 3    |
| <i>VAMP5-VAMP8-GGCX</i>   | rs1561198                     | 1.06, 1.05                           | 85,663,500  | A/G                       | 29%                            | rs10187424           | 0.95  | 2   | 85,647,808  | 0.37/0.38                | 0.449         | 0.97 (0.89-1.05)    | 3    |
|                           |                               |                                      |             |                           |                                | rs1254900            | 0.42  | 2   | 85,669,845  | 0.49/0.47                | 0.0433        | 0.91(0.84-0.99)     |      |
| <i>ZEB2-AC074093.1</i>    | rs2252641                     | 1.06, 1.04                           | 145,517,931 | G/A                       | 27%                            | rs2252641            | 1     | 2   | 145,517,931 | 0.21/0.21                | 0.977         | 1.00 (0.90-1.11)    | 3    |
|                           |                               |                                      |             |                           |                                | rs2381686            | 0.61  | 2   | 145,542,524 | 0.33/0.32                | 0.189         | 1.06(0.97-1.16)     |      |
| <i>WDR12</i>              | rs6725887                     | 1.24(1.12-1.38)                      | 203,454,130 | C/T                       | 79%                            | rs6725887            | 1     | 2   | 203,454,130 | 0.01/0.01                | 0.973         | 1.01 (0.59-1.74)    | 1    |
|                           |                               |                                      |             |                           |                                | rs10190966           | 0.02  | 2   | 203,501,061 | 0.06/0.06                | 0.443         | 1.07(0.90-1.28)     |      |
| <i>MRAS</i>               | rs9818870                     | 1.37 (1.18-1.59)                     | 139,604,812 | T/C                       | 100%                           | rs2306374            | 1     | 3   | 139,602,642 | 0.08/0.08                | 0.999         | 1.00 (0.86-1.16)    | 6    |
|                           |                               |                                      |             |                           |                                | rs1679153            | 0.16  | 3   | 139,634,661 | 0.34/0.36                | 0.223         | 0.94(0.87-1.03)     |      |
| <i>EDNRA</i>              | rs1878406                     | 1.10, 1.06                           | 148,613,114 | T/C                       | 42%                            | rs6842241            | 1     | 4   | 148,620,269 | 0.31/0.30                | 0.362         | 0.96 (0.88-1.05)    | 3    |
|                           |                               |                                      |             |                           |                                | rs4835405            | 0.59  | 4   | 148,598,134 | 0.45/0.44                | 3.17E-01      | 1.05(0.96-1.14)     |      |
| <i>GUCY1A3</i>            | rs1842896                     | 1.23 (1.11–1.37)                     | 156,730,909 | T/G                       | 100%                           | rs1842896            | 1     | 4   | 156,730,909 | 0.25/0.26                | 0.323         | 0.95 (0.86-1.05)    | 5    |
|                           |                               |                                      |             |                           |                                | rs10517622           | 0.79  | 4   | 156,719,121 | 0.22/0.24                | 0.187         | 1.07(0.97-1.19)     |      |
| 5p15.3                    | rs11748327                    | 0.73 (0.56-0.95)                     | 4,082,789   | C/T                       | 100%                           | rs2047074            | 0.84  | 5   | 4,133,229   | 0.23/0.26                | 0.0185        | 0.88 (0.80-0.98)    | 7    |
|                           |                               |                                      |             |                           |                                | rs2136174            | 0.61  | 5   | 4,138,896   | 0.30/0.33                | 6.09E-03      | 1.14(1.04-1.25)     |      |
| <i>SLC22A4-SLC22A5</i>    | rs273909                      | 1.07, 1.09                           | 131,695,252 | C/T                       | 14%                            | rs10071051           | 0.48  | 5   | 131,780,519 | 0.06/0.06                | 0.912         | 0.99 (0.83-1.18)    | 3    |
|                           |                               |                                      |             |                           |                                | rs156055             | 0.49  | 5   | 131,528,076 | 0.05/0.06                | 0.0716        | 1.19(0.99-1.42)     |      |

|                      |            |                  |             |     |      |            |      |   |             |           |          |                  |    |
|----------------------|------------|------------------|-------------|-----|------|------------|------|---|-------------|-----------|----------|------------------|----|
| <i>C6orf105</i>      | rs6903956  | 3.07(1.27-7.45)  | 11,882,569  | A/G | 100% | rs6903956  | 1    | 6 | 11,882,569  | 0.08/0.08 | 0.665    | 0.97 (0.83-1.12) | 8  |
|                      |            |                  |             |     |      | rs6929400  | 0.73 | 6 | 11,882,778  | 0.09/0.09 | 5.48E-01 | 1.05(0.91-1.21)  |    |
| <i>PHACTR1</i>       | rs12526453 | 1.15(1.07-1.24)  | 13,035,530  | C/G | 76%  | rs1332841  | 1    | 6 | 12,983,040  | 0.02/0.02 | 0.358    | 1.17 (0.85-1.63) | 1  |
|                      |            |                  |             |     |      | rs2876303  | 0.07 | 6 | 13,027,853  | 0.14/0.17 | 3.49E-04 | 0.80(0.71-0.90)  |    |
| 6p21.3               | rs3869109  | 1.16             | 31,292,175  | G/A | 94%  | rs3869109  | 1    | 6 | 31,292,175  | 0.50/0.48 | 0.0499   | 0.92 (0.84-1.00) | 9  |
|                      |            |                  |             |     |      | rs3869109  | 1    | 6 | 31,292,175  | 0.50/0.48 | 0.0499   | 0.92 (0.84-1.00) |    |
| <i>C6orf10-BTNL2</i> | rs9268402  | 1.17 (1.07-1.27) | 32,449,331  | G/A | 96%  | rs4424066  | 0.90 | 6 | 32,462,406  | 0.41/0.43 | 0.193    | 0.94 (0.86-1.03) | 5  |
|                      |            |                  |             |     |      | rs10947262 | 0.24 | 6 | 32,481,290  | 0.39/0.42 | 8.84E-04 | 1.17(1.07-1.27)  |    |
| <i>HLA-DQB1</i>      | rs11752643 | 2.08             | 32,777,351  | T/C | 100% | rs11752643 | 1    | 6 | 32,777,351  | 0.08/0.06 | 9.93E-05 | 0.71 (0.60-0.84) | 10 |
|                      |            |                  |             |     |      | rs2647050  | 0.08 | 6 | 32,777,745  | 0.45/0.49 | 5.59E-05 | 0.83(0.77-0.91)  |    |
| <i>ANKS1A</i>        | rs17609940 | 1.08(1.05-1.12)  | 35,142,778  | G/C | 20%  | rs820082   | 1    | 6 | 35,139,419  | 0.02/0.02 | 0.975    | 0.99 (0.72-1.38) | 2  |
|                      |            |                  |             |     |      | rs2049316  | 0.02 | 6 | 35,117,131  | 0.49/0.48 | 0.474    | 0.97(0.89-1.05)  |    |
| <i>KCNK5</i>         | rs10947789 | 1.07, 1.06       | 39,282,900  | T/C | 25%  | rs2033226  | 1    | 6 | 39,290,379  | 0.22/0.24 | 0.0985   | 1.09 (0.99-1.21) | 3  |
|                      |            |                  |             |     |      | rs1366323  | 0.12 | 6 | 39,229,806  | 0.40/0.44 | 7.67E-04 | 1.16(1.07-1.27)  |    |
| <i>TCF21</i>         | rs12190287 | 1.11(1.08-1.14)  | 134,256,218 | C/G | 66%  | rs12524865 | 0.30 | 6 | 134,238,367 | 0.46/0.50 | 7.17E-04 | 1.16 (1.07-1.27) | 2  |
|                      |            |                  |             |     |      | rs1535616  | 0.29 | 6 | 134,212,825 | 0.46/0.50 | 4.49E-04 | 1.17(1.08-1.27)  |    |
| <i>MTHFD1L</i>       | rs6922269  | 1.23 (1.13-1.35) | 151,294,678 | A/G | 100% | rs6902664  | 1    | 6 | 151,294,610 | 0.01/0.01 | 0.837    | 1.04 (0.72-1.50) | 4  |
|                      |            |                  |             |     |      | rs1474787  | 1    | 6 | 151,295,075 | 0.01/0.01 | 0.746    | 0.94(0.65-1.35)  |    |
| <i>LPA</i>           | rs3798220  | 1.51(1.33-C1.70) | 160,881,127 | C/T | 100% | rs4708867  | 0.33 | 6 | 160,762,715 | 0.16/0.15 | 0.209    | 1.08 (0.96-1.21) | 2  |
|                      |            |                  |             |     |      | rs4708867  | 0.33 | 6 | 160,762,715 | 0.16/0.15 | 0.209    | 1.08 (0.96-1.21) |    |
| <i>PLG</i>           | rs4252120  | 1.07, 1.06       | 161,063,598 | T/C | 22%  | -          | -    | - | -           | 0.00/0.00 | -        | -                | 3  |
| <i>HDAC9</i>         | rs2023938  | 1.08, 1.07       | 19,003,300  | G/A | 16%  | -          | -    | - | -           | 0.00/0.00 | -        | -                | 3  |
| <i>CKD14</i>         | rs1859023  | 1.75(1.45-2.17)  | 90,078,521  | G/A | 100% | rs7797824  | 1    | 7 | 90,110,813  | 0.26/0.26 | 0.820    | 1.01 (0.92-1.11) | 11 |
|                      |            |                  |             |     |      | rs2106730  | 0.07 | 7 | 90,085,244  | 0.08/0.09 | 0.0915   | 1.15(0.98-1.34)  |    |
| 7q22                 | rs10953541 | 1.08(1.05-1.11)  | 107,031,781 | C/T | 24%  | rs10953541 | 1    | 7 | 107,031,781 | 0.09/0.09 | 0.886    | 1.01 (0.87-1.17) | 12 |
|                      |            |                  |             |     |      | rs2248465  | 0.11 | 7 | 107,090,864 | 0.42/0.43 | 0.492    | 1.03(0.95-1.12)  |    |
| <i>ZC3HC1</i>        | rs11556924 | 1.09(1.07-1.12)  | 129,450,732 | C/T | 37%  | rs11766629 | 0.21 | 7 | 129,149,901 | 0.07/0.08 | 0.197    | 0.89 (0.76-1.05) | 2  |
|                      |            |                  |             |     |      | rs4731641  | 0.02 | 7 | 129,424,930 | 0.31/0.29 | 0.102    | 1.08(0.99-1.19)  |    |
| <i>LPL</i>           | rs264      | 1.11, 1.05       | 19,857,460  | G/A | 42%  | rs264      | 1    | 8 | 19,857,460  | 0.21/0.21 | 0.892    | 1.01 (0.91-1.12) | 3  |
|                      |            |                  |             |     |      | rs10096633 | 0.21 | 8 | 19,875,201  | 0.11/0.13 | 0.0288   | 1.17(1.02-1.33)  |    |
| <i>TRIB1</i>         | rs2954029  | 1.06, 1.04       | 126,560,154 | A/T | 28%  | rs2980869  | 1    | 8 | 126,557,432 | 0.46/0.48 | 0.0777   | 1.08 (1.00-1.18) | 3  |
|                      |            |                  |             |     |      | rs2980869  | 1    | 8 | 126,557,432 | 0.46/0.48 | 0.0777   | 1.08 (1.00-1.18) |    |

|                  |            |                  |             |     |      |            |      |    |             |           |          |                  |      |
|------------------|------------|------------------|-------------|-----|------|------------|------|----|-------------|-----------|----------|------------------|------|
| <i>CDKN2B</i>    | rs7865618  | 1.18(1.09-1.28)  | 22,021,005  | A/G | 90%  | rs573687   | 1    | 9  | 22,001,642  | 0.14/0.15 | 0.0556   | 1.13 (1.00-1.27) | 4,13 |
|                  |            |                  |             |     |      | rs1412832  | 0.47 | 9  | 22,067,543  | 0.28/0.32 | 5.55E-05 | 0.82(0.75-0.90)  |      |
| 9p21.3           | rs1333049  | 1.37 (1.27-1.49) | 22,115,503  | C/G | 100% | rs944797   | 0.91 | 9  | 22,105,286  | 0.49/0.46 | 2.37E-05 | 1.21 (1.11-1.31) | 4    |
|                  |            |                  |             |     |      | rs4977574  | 0.91 | 9  | 22,088,574  | 0.49/0.46 | 7.53E-06 | 1.22(1.12-1.33)  |      |
| <i>ABO</i>       | rs579459   | 1.10(1.06-1.14)  | 135,143,989 | C/T | 44%  | rs657152   | 0.37 | 9  | 135,129,086 | 0.48/0.45 | 2.63E-03 | 0.87 (0.80-0.95) | 2    |
|                  |            |                  |             |     |      | rs630014   | 0.16 | 9  | 135,139,543 | 0.33/0.37 | 8.59E-04 | 1.17(1.07-1.28)  |      |
| <i>KIAA1462</i>  | rs2505083  | 1.07(1.04-1.09)  | 30,375,128  | C/T | 31%  | rs2505083  | 1    | 10 | 30,375,128  | 0.18/0.19 | 0.531    | 0.96 (0.86-1.08) | 12   |
|                  |            |                  |             |     |      | rs10826758 | 0.26 | 10 | 30,407,329  | 0.31/0.33 | 0.078541 | 1.09(0.99-1.19)  |      |
| <i>CXCL12</i>    | rs1746048  | 1.22(1.10-1.34)  | 44,095,830  | C/T | 99%  | rs1746048  | 1    | 10 | 44,095,830  | 0.29/0.30 | 0.516    | 1.03 (0.94-1.13) | 1    |
|                  |            |                  |             |     |      | rs1704224  | 0.04 | 10 | 43,997,206  | 0.02/0.03 | 0.0579   | 1.33(1.00-1.77)  |      |
| <i>LIPA</i>      | rs1412444  | 1.09(1.07-1.12)  | 90,992,907  | T/C | 51%  | rs1412444  | 1    | 10 | 90,992,907  | 0.24/0.22 | 0.153    | 0.93 (0.84-1.02) | 12   |
|                  |            |                  |             |     |      | rs2243547  | 0.69 | 10 | 91,000,459  | 0.26/0.23 | 0.012    | 1.14(1.03-1.25)  |      |
| <i>CNNM2</i>     | rs12413409 | 1.13(1.07-1.19)  | 104,709,086 | G/A | 53%  | rs12413409 | 1    | 10 | 104,709,086 | 0.24/0.26 | 0.0612   | 1.10 (1.00-1.21) | 2    |
|                  |            |                  |             |     |      | rs3824754  | 0.82 | 10 | 104,604,340 | 0.29/0.31 | 0.0298   | 1.11(1.01-1.22)  |      |
| <i>PDGFD</i>     | rs974819   | 1.07(1.04-1.09)  | 103,165,777 | T/C | 36%  | rs974819   | 1    | 11 | 103,165,777 | 0.37/0.39 | 0.122    | 0.93 (0.85-1.02) | 12   |
|                  |            |                  |             |     |      | rs17405661 | 0.12 | 11 | 103,266,588 | 0.18/0.16 | 0.0123   | 0.86(0.77-0.96)  |      |
| 11q23.3          | rs964184   | 1.13(1.09-1.18)  | 116,154,127 | G/C | 66%  | rs180326   | 0.93 | 11 | 116,129,913 | 0.29/0.26 | 0.0151   | 1.13 (1.03-1.24) | 2    |
|                  |            |                  |             |     |      | rs6589567  | 0.31 | 11 | 116,175,886 | 0.40/0.37 | 4.13E-03 | 0.88(0.80-0.96)  |      |
| <i>ATP2B1</i>    | rs7136259  | 1.21 (1.11-1.33) | 88,605,319  | T/C | 99%  | rs1401982  | 1    | 12 | 88,513,730  | 0.40/0.38 | 0.189    | 1.06 (0.97-1.16) | 5    |
|                  |            |                  |             |     |      | rs10858918 | 0.64 | 12 | 88,620,476  | 0.27/0.26 | 0.089    | 0.92(0.83-1.01)  |      |
| <i>ALDH2</i>     | rs671      | 1.69             | 110,726,149 | A/G | 100% | rs3782886  | 0.93 | 12 | 110,594,872 | 0.34/0.26 | 1.14E-14 | 1.46 (1.33-1.60) | 10   |
|                  |            |                  |             |     |      | rs3782886  | 0.93 | 12 | 110,594,872 | 0.34/0.26 | 1.14E-14 | 1.46 (1.33-1.60) |      |
| <i>FLT1</i>      | rs9319428  | 1.06, 1.05       | 27,871,621  | A/G | 26%  | rs9319428  | 1    | 13 | 27,871,621  | 0.38/0.38 | 0.746    | 1.02 (0.93-1.11) | 3    |
|                  |            |                  |             |     |      | rs9319428  | 1    | 13 | 27,871,621  | 0.38/0.38 | 0.746    | 1.02 (0.93-1.11) |      |
| <i>COL4A2</i>    | rs4773144  | 1.08 (1.05-1.12) | 109,758,713 | G/A | 44%  | rs7317784  | 0.17 | 13 | 109,753,075 | 0.31/0.34 | 9.92E-04 | 0.86 (0.78-0.94) | 2    |
| <i>HHIPL1</i>    | rs2895811  | 1.09(1.06-1.13)  | 99,203,695  | C/T | 49%  | rs11844169 | 0.36 | 14 | 99,203,151  | 0.44/0.43 | 0.746    | 0.99 (0.91-1.07) | 2    |
|                  |            |                  |             |     |      | rs12435918 | 0.31 | 14 | 99,240,648  | 0.42/0.41 | 0.163    | 1.07(0.98-1.16)  |      |
| <i>SMAD3</i>     | rs17228212 | 1.19 (1.09-1.3)  | 65,245,693  | C/T | 86%  | -          | -    | -  | -           | 0.00/0.00 | -        | -                | 4    |
| <i>ADAMTS7</i>   | rs3825807  | 1.07(1.04-1.10)  | 76,876,166  | A/G | 30%  | rs11638372 | 0.10 | 15 | 76,770,614  | 0.02/0.02 | 0.885    | 1.02 (0.77-1.35) | 2    |
|                  |            |                  |             |     |      | rs8041377  | 0.02 | 15 | 76,773,860  | 0.12/0.10 | 0.0372   | 1.16(1.02-1.32)  |      |
| <i>FURIN-FES</i> | rs17514846 | 1.07, 1.05       | 89,217,554  | A/C | 36%  | rs17514846 | 1    | 15 | 89,217,554  | 0.16/0.14 | 0.138    | 0.91 (0.81-1.02) | 3    |
|                  |            |                  |             |     |      | rs3759929  | 1    | 15 | 89,211,013  | 0.16/0.15 | 0.0655   | 0.89(0.80-1.00)  |      |

|                    |            |                 |            |     |     |            |      |    |            |           |        |                  |   |
|--------------------|------------|-----------------|------------|-----|-----|------------|------|----|------------|-----------|--------|------------------|---|
| SMG6               | rs216172   | 1.08(1.05-1.12) | 2,073,254  | C/G | 41% | rs11655813 | 1    | 17 | 2,065,851  | 0.23/0.22 | 0.541  | 0.97 (0.87-1.07) | 2 |
|                    |            |                 |            |     |     | rs8067305  | 0.35 | 17 | 1,922,407  | 0.28/0.27 | 0.171  | 0.93(0.85-1.03)  |   |
| 17p11.2            | rs12936587 | 1.08(1.05-1.11) | 17,484,447 | G/A | 39% | rs4925094  | 0.60 | 17 | 17,509,737 | 0.09/0.08 | 0.918  | 0.99 (0.86-1.15) | 2 |
|                    |            |                 |            |     |     | rs11871738 | 0.35 | 17 | 17,465,968 | 0.06/0.06 | 0.139  | 0.87(0.73-1.04)  |   |
| UBE2Z              | rs46522    | 1.07(1.04-1.10) | 44,343,596 | T/C | 36% | rs962272   | 1    | 17 | 44,333,282 | 0.27/0.28 | 0.211  | 1.06 (0.97-1.17) | 2 |
|                    |            |                 |            |     |     | rs3809770  | 0.84 | 17 | 44,402,595 | 0.24/0.25 | 0.157  | 0.93(0.84-1.02)  |   |
| LDLR               | rs1122608  | 1.18(1.09-1.28) | 11,024,601 | G/T | 80% | rs3786725  | 1    | 19 | 11,027,827 | 0.11/0.12 | 0.317  | 1.07 (0.94-1.22) | 1 |
|                    |            |                 |            |     |     | rs12610607 | 0.19 | 19 | 10,945,994 | 0.19/0.21 | 0.0408 | 0.89(0.80-0.99)  |   |
| SLC5A3-MRPS6-KCNE2 | rs9982601  | 1.20(1.07-1.33) | 34,520,998 | T/C | 80% | -          | -    |    |            | 0.00/0.00 | -      | -                | 1 |

The  $r^2$  shows the coefficient between SNP on Illumina Human610-Quad BeadChip and the previously reported SNP based on the Phase II of HapMap JPT data. Chromosomal location was based on Genome Build 36.3.

Two proxy SNPs are provided for each gene or locus. The upper one is a SNP showing the highest  $r^2$  with the reported SNP for this locus, and the lower one is a SNP with the lowest P within the LD block. When these 2 proxy SNPs are identical with each other, the upper one is repeated in the lower lane.

**Table S2 Summary results for replication study 1.**

| SNP        | Chr<br>chrloc     | Nearest gene        | allele 1/2 | study         | maf_case | maf_ctrl | <i>P</i> | OR (95%CI)       | <i>P</i> <sub>het</sub> |
|------------|-------------------|---------------------|------------|---------------|----------|----------|----------|------------------|-------------------------|
| rs11260745 | 1<br>16,338,590   | <i>EPHA2</i>        | T/C        | GWAS          | 0.09     | 0.12     | 7.42E-05 | 0.74 (0.65-0.86) |                         |
|            |                   |                     |            | Replication 1 | 0.11     | 0.11     | 7.83E-01 | 1.01 (0.95-1.07) |                         |
|            |                   |                     |            | ALL           |          |          | 2.80E-01 | 0.97 (0.92-1.02) | 1.37E-04                |
| rs10798939 | 1<br>33,582,024   | <i>PHC2</i>         | A/G        | GWAS          | 0.12     | 0.15     | 5.06E-05 | 0.76 (0.67-0.86) |                         |
|            |                   |                     |            | Replication 1 | 0.14     | 0.14     | 1.38E-01 | 0.96 (0.92-1.01) |                         |
|            |                   |                     |            | ALL           |          |          | 3.34E-03 | 0.93 (0.89-0.98) | 1.35E-03                |
| rs9645433  | 1<br>41,700,293   | <i>EDN2</i>         | T/C        | GWAS          | 0.04     | 0.02     | 8.78E-05 | 1.64 (1.29-2.09) |                         |
|            |                   |                     |            | Replication 1 | 0.03     | 0.03     | 3.92E-01 | 1.05 (0.94-1.16) |                         |
|            |                   |                     |            | ALL           |          |          | 1.96E-02 | 1.12 (1.02-1.23) | 1.20E-03                |
| rs17021749 | 1<br>212,217,105  | <i>PROX1</i>        | A/G        | GWAS          | 0.18     | 0.15     | 8.30E-05 | 0.79 (0.70-0.88) |                         |
|            |                   |                     |            | Replication 1 | 0.16     | 0.16     | 4.74E-01 | 0.98 (0.94-1.03) |                         |
|            |                   |                     |            | ALL           |          |          | 2.64E-02 | 0.95 (0.91-0.99) | 8.17E-04                |
| rs2467473  | 3<br>14,873,140   | <i>FGD5</i>         | A/C        | GWAS          | 0.47     | 0.43     | 3.15E-05 | 1.21 (1.11-1.31) |                         |
|            |                   |                     |            | Replication 1 | 0.46     | 0.44     | 3.80E-04 | 1.06 (1.03-1.10) |                         |
|            |                   |                     |            | ALL           |          |          | 4.53E-06 | 1.08 (1.04-1.11) | 7.55E-03                |
| rs13070927 | 3<br>14,894,650   | <i>FGD5</i>         | T/G        | GWAS          | 0.19     | 0.23     | 4.65E-05 | 1.25 (1.13-1.39) |                         |
|            |                   |                     |            | Replication 1 | 0.21     | 0.22     | 5.27E-03 | 1.06 (1.02-1.11) |                         |
|            |                   |                     |            | ALL           |          |          | 6.65E-05 | 1.08 (1.04-1.13) | 4.96E-03                |
| rs9879150  | 3<br>16,945,785   | <i>PLCL2</i>        | T/C        | GWAS          | 0.49     | 0.44     | 5.92E-05 | 0.84 (0.77-0.91) |                         |
|            |                   |                     |            | Replication 1 | 0.47     | 0.45     | 1.52E-02 | 0.96 (0.93-0.99) |                         |
|            |                   |                     |            | ALL           |          |          | 2.85E-04 | 0.94 (0.91-0.97) | 4.11E-03                |
| rs4618210  | 3<br>17,099,388   | <i>PLCL2</i>        | T/C        | GWAS          | 0.45     | 0.40     | 6.78E-05 | 0.84 (0.77-0.91) |                         |
|            |                   |                     |            | Replication 1 | 0.44     | 0.42     | 5.18E-07 | 0.91 (0.88-0.95) |                         |
|            |                   |                     |            | ALL           |          |          | 1.43E-10 | 0.90 (0.87-0.93) | 7.96E-02                |
| rs4684309  | 3<br>17,122,967   | <i>PLCL2</i>        | A/G        | GWAS          | 0.46     | 0.50     | 4.80E-05 | 0.83 (0.77-0.91) |                         |
|            |                   |                     |            | Replication 1 | 0.48     | 0.49     | 1.34E-02 | 0.96 (0.92-0.99) |                         |
|            |                   |                     |            | ALL           |          |          | 2.75E-04 | 0.94 (0.91-0.97) | 3.38E-03                |
| rs1587425  | 3<br>25,146,992   | <i>LOC100130354</i> | T/C        | GWAS          | 0.28     | 0.32     | 7.12E-05 | 1.21 (1.11-1.33) |                         |
|            |                   |                     |            | Replication 1 | 0.31     | 0.32     | 1.06E-01 | 1.03 (0.99-1.07) |                         |
|            |                   |                     |            | ALL           |          |          | 3.79E-03 | 1.05 (1.02-1.09) | 1.77E-03                |
| rs1543991  | 6<br>111,038,725  | <i>CDC2L6</i>       | T/C        | GWAS          | 0.39     | 0.35     | 9.15E-05 | 1.20 (1.10-1.31) |                         |
|            |                   |                     |            | Replication 1 | 0.37     | 0.36     | 2.92E-01 | 1.02 (0.98-1.06) |                         |
|            |                   |                     |            | ALL           |          |          | 1.44E-02 | 1.04 (1.01-1.08) | 1.23E-03                |
| rs2211704  | 8<br>37,501,134   | <i>LOC100128034</i> | A/G        | GWAS          | 0.42     | 0.47     | 2.84E-05 | 0.83 (0.76-0.90) |                         |
|            |                   |                     |            | Replication 1 | 0.45     | 0.45     | 5.44E-01 | 0.99 (0.96-1.02) |                         |
|            |                   |                     |            | ALL           |          |          | 4.22E-02 | 0.97 (0.94-1.00) | 2.18E-04                |
| rs10982874 | 9<br>117,488,028  | <i>DEC1</i>         | T/C        | GWAS          | 0.22     | 0.18     | 3.26E-05 | 0.79 (0.71-0.88) |                         |
|            |                   |                     |            | Replication 1 | 0.20     | 0.20     | 1.47E-01 | 0.97 (0.93-1.01) |                         |
|            |                   |                     |            | ALL           |          |          | 4.96E-03 | 0.94 (0.91-0.98) | 8.08E-04                |
| rs9415880  | 10<br>68,871,540  | <i>CTNNA3</i>       | T/C        | GWAS          | 0.43     | 0.38     | 1.04E-05 | 0.82 (0.75-0.89) |                         |
|            |                   |                     |            | Replication 1 | 0.39     | 0.39     | 9.60E-01 | 1.00 (0.96-1.04) |                         |
|            |                   |                     |            | ALL           |          |          | 1.05E-01 | 0.97 (0.94-1.01) | 4.29E-05                |
| rs652054   | 11<br>74,953,180  | <i>SERPINH1</i>     | T/G        | GWAS          | 0.26     | 0.23     | 8.52E-05 | 0.82 (0.74-0.90) |                         |
|            |                   |                     |            | Replication 1 | 0.24     | 0.23     | 2.72E-02 | 0.96 (0.92-0.99) |                         |
|            |                   |                     |            | ALL           |          |          | 1.04E-03 | 0.94 (0.90-0.97) | 3.58E-03                |
| rs1818702  | 12<br>102,047,685 | <i>LOC644171</i>    | T/C        | GWAS          | 0.41     | 0.36     | 3.87E-06 | 0.81 (0.74-0.88) |                         |
|            |                   |                     |            | Replication 1 | 0.37     | 0.37     | 6.54E-01 | 0.99 (0.96-1.03) |                         |
|            |                   |                     |            | ALL           |          |          | 2.82E-02 | 0.96 (0.93-1.00) | 4.31E-05                |
| rs1314917  | 14<br>67,781,284  | <i>RAD51L1</i>      | A/C        | GWAS          | 0.41     | 0.45     | 6.45E-05 | 1.20 (1.10-1.30) |                         |
|            |                   |                     |            | Replication 1 | 0.43     | 0.44     | 8.14E-02 | 1.03 (1.00-1.07) |                         |
|            |                   |                     |            | ALL           |          |          | 2.64E-03 | 1.05 (1.02-1.09) | 1.92E-03                |
| rs1957572  | 14<br>67,806,224  | <i>RAD51L1</i>      | T/C        | GWAS          | 0.50     | 0.45     | 4.55E-05 | 1.20 (1.10-1.30) |                         |
|            |                   |                     |            | Replication 1 | 0.47     | 0.46     | 5.51E-01 | 1.01 (0.98-1.05) |                         |
|            |                   |                     |            | ALL           |          |          | 4.23E-02 | 1.03 (1.00-1.07) | 3.52E-04                |
| rs2778936  | 14<br>88,042,056  | <i>PTPN21</i>       | A/G        | GWAS          | 0.40     | 0.35     | 6.69E-05 | 1.20 (1.10-1.31) |                         |
|            |                   |                     |            | Replication 1 | 0.37     | 0.36     | 1.40E-01 | 1.03 (0.99-1.06) |                         |
|            |                   |                     |            | ALL           |          |          | 2.98E-03 | 1.05 (1.02-1.09) | 1.89E-03                |
| rs7172432  | 15<br>60,183,681  | <i>LOC100129972</i> | A/G        | GWAS          | 0.40     | 0.44     | 3.62E-05 | 0.83 (0.76-0.90) |                         |
|            |                   |                     |            | Replication 1 | 0.43     | 0.42     | 6.25E-02 | 1.03 (1.00-1.07) |                         |

|           |            |                     |     |               |      |      |          |                  |          |
|-----------|------------|---------------------|-----|---------------|------|------|----------|------------------|----------|
|           |            |                     |     | ALL           |      |      | 9.59E-01 | 1.00 (0.97-1.03) | 8.83E-06 |
| rs1370176 | 15         | <i>LOC100129972</i> | A/G | GWAS          | 0.31 | 0.35 | 4.96E-05 | 1.22 (1.11-1.33) |          |
|           | 60,184,526 |                     |     | Replication 1 | 0.34 | 0.33 | 1.24E-01 | 0.97 (0.94-1.01) |          |
|           |            |                     |     | ALL           |      |      | 9.55E-01 | 1.00 (0.97-1.03) | 1.26E-05 |
| rs4775468 | 15         | <i>LOC100129972</i> | T/C | GWAS          | 0.17 | 0.20 | 8.15E-05 | 1.26 (1.13-1.41) |          |
|           | 60,189,218 |                     |     | Replication 1 | 0.19 | 0.19 | 5.97E-01 | 0.99 (0.95-1.03) |          |
|           |            |                     |     | ALL           |      |      | 3.25E-01 | 1.02 (0.98-1.06) | 1.27E-04 |
| rs2603229 | 15         | <i>LYSMD4</i>       | T/C | GWAS          | 0.31 | 0.35 | 8.44E-05 | 1.21 (1.10-1.32) |          |
|           | 98,081,022 |                     |     | Replication 1 | 0.34 | 0.33 | 6.31E-01 | 0.99 (0.96-1.03) |          |
|           |            |                     |     | ALL           |      |      | 3.57E-01 | 1.02 (0.98-1.05) | 1.16E-04 |
| rs7200879 | 16         | <i>FBXL19</i>       | A/G | GWAS          | 0.10 | 0.07 | 3.89E-05 | 1.39 (1.19-1.61) |          |
|           | 30,855,073 |                     |     | Replication 1 | 0.09 | 0.09 | 5.00E-01 | 1.02 (0.96-1.08) |          |
|           |            |                     |     | ALL           |      |      | 3.77E-02 | 1.06 (1.00-1.12) | 3.32E-04 |
| rs7186131 | 16         | <i>IRX6</i>         | T/C | GWAS          | 0.38 | 0.34 | 2.40E-05 | 0.82 (0.75-0.90) |          |
|           | 53,769,051 |                     |     | Replication 1 | 0.36 | 0.36 | 3.25E-01 | 0.98 (0.95-1.02) |          |
|           |            |                     |     | ALL           |      |      | 1.03E-02 | 0.96 (0.93-0.99) | 4.25E-04 |
| rs9936363 | 16         | <i>CDH13</i>        | A/G | GWAS          | 0.03 | 0.05 | 3.72E-05 | 0.60 (0.47-0.76) |          |
|           | 81,264,849 |                     |     | Replication 1 | 0.04 | 0.04 | 6.57E-01 | 1.02 (0.94-1.11) |          |
|           |            |                     |     | ALL           |      |      | 3.58E-01 | 0.96 (0.89-1.04) | 6.27E-05 |
| rs4941178 | 18         | <i>BCL2</i>         | A/G | GWAS          | 0.17 | 0.21 | 4.63E-05 | 1.26 (1.13-1.41) |          |
|           | 58,909,266 |                     |     | Replication 1 | 0.19 | 0.19 | 7.99E-01 | 1.01 (0.96-1.05) |          |
|           |            |                     |     | ALL           |      |      | 6.00E-02 | 1.04 (1.00-1.08) | 2.83E-04 |
| rs3803915 | 19         | <i>DOT1L</i>        | A/C | GWAS          | 0.22 | 0.19 | 5.59E-05 | 0.80 (0.72-0.89) |          |
|           | 2,111,529  |                     |     | Replication 1 | 0.21 | 0.19 | 6.90E-06 | 0.91 (0.87-0.95) |          |
|           |            |                     |     | ALL           |      |      | 3.79E-08 | 0.89 (0.86-0.93) | 3.18E-02 |
| rs2269881 | 19         | <i>DOT1L</i>        | T/C | GWAS          | 0.45 | 0.41 | 3.40E-05 | 0.83 (0.76-0.90) |          |
|           | 2,146,799  |                     |     | Replication 1 | 0.44 | 0.43 | 3.25E-03 | 0.95 (0.92-0.98) |          |
|           |            |                     |     | ALL           |      |      | 2.80E-05 | 0.93 (0.90-0.96) | 5.02E-03 |
| rs2195956 | 19         | <i>ZNF536</i>       | T/C | GWAS          | 0.02 | 0.01 | 1.52E-05 | 0.44 (0.31-0.64) |          |
|           | 35,806,921 |                     |     | Replication 1 | 0.01 | 0.01 | 9.13E-01 | 1.01 (0.85-1.20) |          |
|           |            |                     |     | ALL           |      |      | 9.63E-02 | 0.87 (0.75-1.02) | 1.10E-04 |

The  $P$  values of GWAS were the genomic-control  $P$  values ( $P_{GC}$ ). The combined  $P$  values were calculated by the inverse variance method.

The  $P$  values of heterogeneities ( $P_{het}$ ) across the population were estimated formally using the Breslow-Day test.

Chr, chromosome; chrloc, chromosome location based on Genome Build 36.3; maf, minor allele frequency;

OR, odds ratio which was calculated using allele 1 as the reference ; CI, confidence interval which was calculated using allele 1 as the refer

**Table S3 Distributions of minor allele frequencies by disease status in control sets**

|                                      |                                   | rs3803915             |             |           |           |           |          | rs4618210  |                                                |           |           |           |          |            |            |
|--------------------------------------|-----------------------------------|-----------------------|-------------|-----------|-----------|-----------|----------|------------|------------------------------------------------|-----------|-----------|-----------|----------|------------|------------|
| <b>GWAS control samples</b>          |                                   | <b>disease status</b> | <b>n(%)</b> | <b>AA</b> | <b>AC</b> | <b>CC</b> | <b>A</b> | <b>C</b>   | <b>maf</b>                                     | <b>AA</b> | <b>AG</b> | <b>GG</b> | <b>A</b> | <b>G</b>   | <b>maf</b> |
|                                      | <i>Healthy volunteer</i>          |                       | 906(26.7)   | 34        | 267       | 605       | 335      | 1477       | 0.185                                          | 143       | 447       | 316       | 733      | 1079       | 0.405      |
|                                      | Hepatic cancer                    |                       | 181(5.3)    | 12        | 45        | 124       | 69       | 293        | 0.191                                          | 35        | 84        | 62        | 154      | 208        | 0.425      |
|                                      | Cervical cancer                   |                       | 174(5.1)    | 6         | 57        | 111       | 69       | 279        | 0.198                                          | 35        | 74        | 65        | 144      | 204        | 0.414      |
|                                      | Chronic hepatitis B               |                       | 178(5.2)    | 6         | 48        | 124       | 60       | 296        | 0.169                                          | 31        | 75        | 71        | 137      | 217        | 0.387      |
|                                      | Esophageal cancer                 |                       | 182(5.4)    | 5         | 52        | 125       | 62       | 302        | 0.170                                          | 29        | 92        | 61        | 150      | 214        | 0.412      |
|                                      | Hematopoietic tumor               |                       | 183(5.4)    | 5         | 52        | 126       | 62       | 304        | 0.169                                          | 34        | 80        | 69        | 148      | 218        | 0.404      |
|                                      | Uterine cancer                    |                       | 180(5.3)    | 5         | 53        | 122       | 63       | 297        | 0.175                                          | 24        | 87        | 69        | 135      | 225        | 0.375      |
|                                      | Ovarian cancer                    |                       | 185(5.4)    | 5         | 55        | 125       | 65       | 305        | 0.176                                          | 26        | 86        | 73        | 138      | 232        | 0.373      |
|                                      | Tuberculosis                      |                       | 182(5.4)    | 2         | 57        | 123       | 61       | 303        | 0.168                                          | 35        | 88        | 59        | 158      | 206        | 0.434      |
|                                      | Keloid                            |                       | 184(5.4)    | 9         | 55        | 120       | 73       | 295        | 0.198                                          | 23        | 97        | 64        | 143      | 225        | 0.389      |
|                                      | Eruption                          |                       | 453(13.3)   | 14        | 147       | 292       | 175      | 731        | 0.193                                          | 92        | 200       | 160       | 384      | 520        | 0.425      |
|                                      | Fever convulsion                  |                       | 42(1.2)     | 5         | 14        | 23        | 24       | 60         | 0.286                                          | 7         | 18        | 17        | 32       | 52         | 0.381      |
|                                      | GB cancer                         |                       | 184(5.4)    | 8         | 46        | 130       | 62       | 306        | 0.168                                          | 34        | 82        | 68        | 150      | 218        | 0.408      |
|                                      | Pancreatic cancer                 |                       | 183(5.4)    | 6         | 50        | 127       | 62       | 304        | 0.169                                          | 31        | 89        | 63        | 151      | 215        | 0.413      |
|                                      |                                   |                       |             |           |           |           |          |            | X-squared = 11.0265, df = 12, p-value = 0.5266 |           |           |           |          |            |            |
|                                      |                                   |                       |             |           |           |           |          |            | X-squared = 9.0882, df = 12, p-value = 0.6954  |           |           |           |          |            |            |
| <b>Replication 1 control samples</b> |                                   | <b>disease status</b> | <b>n(%)</b> | <b>AA</b> | <b>AC</b> | <b>CC</b> | <b>A</b> | <b>C</b>   | <b>maf</b>                                     | <b>AA</b> | <b>AG</b> | <b>GG</b> | <b>A</b> | <b>G</b>   | <b>maf</b> |
|                                      | Colorectal cancer                 |                       | 1521(5.7)   | 52        | 482       | 987       | 586      | 2456       | 0.193                                          | 246       | 726       | 549       | 1218     | 1824       | 0.400      |
|                                      | Breast cancer                     |                       | 1577(5.9)   | 52        | 495       | 1030      | 599      | 2555       | 0.190                                          | 256       | 782       | 539       | 1294     | 1860       | 0.410      |
|                                      | Prostate cancer                   |                       | 1534(5.8)   | 68        | 456       | 1010      | 592      | 2476       | 0.193                                          | 269       | 734       | 531       | 1272     | 1796       | 0.415      |
|                                      | Lung cancer                       |                       | 1533(5.8)   | 59        | 467       | 1007      | 585      | 2481       | 0.191                                          | 283       | 752       | 498       | 1318     | 1748       | 0.430      |
|                                      | Stomach cancer                    |                       | 1501(5.6)   | 63        | 454       | 984       | 580      | 2422       | 0.193                                          | 243       | 737       | 521       | 1223     | 1779       | 0.407      |
|                                      | Diabetes Mellitus                 |                       | 2403(9.0)   | 95        | 753       | 1555      | 943      | 3863       | 0.196                                          | 449       | 1164      | 790       | 2062     | 2744       | 0.429      |
|                                      | Peripheral artery disease         |                       | 464(1.7)    | 21        | 143       | 300       | 185      | 743        | 0.199                                          | 82        | 200       | 182       | 364      | 564        | 0.392      |
|                                      | Arrhythmia(arterial fibrillation) |                       | 662(2.5)    | 28        | 209       | 425       | 265      | 1059       | 0.200                                          | 124       | 314       | 224       | 562      | 762        | 0.424      |
|                                      | Cerebral infarction               |                       | 1437(5.4)   | 53        | 430       | 954       | 536      | 2338       | 0.186                                          | 273       | 706       | 458       | 1252     | 1622       | 0.436      |
|                                      | GB cancer                         |                       | 128(0.5)    | 3         | 36        | 89        | 42       | 214        | 0.164                                          | 20        | 60        | 48        | 100      | 156        | 0.391      |
|                                      | Pancreatic cancer                 |                       | 138(0.5)    | 4         | 39        | 95        | 47       | 229        | 0.170                                          | 27        | 72        | 39        | 126      | 150        | 0.457      |
|                                      | Anticancer drugs side effect      |                       | 3309(12.4)  | 109       | 1047      | 2153      | 1265     | 5353       | 0.191                                          | 571       | 1618      | 1119      | 2760     | 3856       | 0.417      |
|                                      | Eruption                          |                       | 92(0.3)     | 2         | 22        | 68        | 26       | 158        | 0.141                                          | 19        | 39        | 34        | 77       | 107        | 0.418      |
|                                      | Rheumatoid Arthritis              |                       | 2267(8.5)   | 78        | 723       | 1466      | 879      | 3655       | 0.194                                          | 409       | 1078      | 779       | 1896     | 2636       | 0.418      |
|                                      | Warfarin effect                   |                       | 1105(4.1)   | 46        | 357       | 702       | 449      | 1761       | 0.203                                          | 205       | 534       | 364       | 944      | 1262       | 0.428      |
|                                      | Amyotrophic lateral sclerosis     |                       | 709(2.7)    | 29        | 225       | 455       | 283      | 1135       | 0.200                                          | 140       | 336       | 233       | 616      | 802        | 0.434      |
|                                      | Hepatic cancer                    |                       | 1429(5.4)   | 61        | 426       | 942       | 548      | 2310       | 0.192                                          | 244       | 710       | 474       | 1198     | 1658       | 0.419      |
|                                      | Liver cirrhosis                   |                       | 1642(6.2)   | 73        | 520       | 1049      | 666      | 2618       | 0.203                                          | 259       | 821       | 562       | 1339     | 1945       | 0.408      |
|                                      | Osteoporosis                      |                       | 1605(6.0)   | 74        | 482       | 1049      | 630      | 2580       | 0.196                                          | 287       | 769       | 549       | 1343     | 1867       | 0.418      |
|                                      | Myoma                             |                       | 1603(6.0)   | 51        | 506       | 1046      | 608      | 2598       | 0.190                                          | 281       | 770       | 552       | 1332     | 1874       | 0.415      |
|                                      |                                   |                       |             |           |           |           |          |            | X-squared = 13.2715, df = 20, p-value = 0.8654 |           |           |           |          |            |            |
|                                      |                                   |                       |             |           |           |           |          |            | X-squared = 23.3681, df = 20, p-value = 0.2711 |           |           |           |          |            |            |
| <b>Replication 2 control samples</b> |                                   | <b>disease status</b> | <b>n(%)</b> | <b>AA</b> | <b>AC</b> | <b>CC</b> | <b>A</b> | <b>C</b>   | <b>maf</b>                                     | <b>AA</b> | <b>AG</b> | <b>GG</b> | <b>A</b> | <b>G</b>   | <b>maf</b> |
|                                      | <i>Healthy volunteer</i>          |                       | 932(54.0)   | 30        | 288       | 614       | 348      | 1516       | 0.187                                          | 193       | 428       | 311       | 814      | 1050       | 0.437      |
|                                      | Cerebral aneurysm                 |                       | 49(2.8)     | 1         | 11        | 37        | 13       | 85         | 0.133                                          | 9         | 25        | 15        | 43       | 55         | 0.439      |
|                                      | Esophageal cancer                 |                       | 320(18.6)   | 10        | 92        | 218       | 112      | 528        | 0.175                                          | 64        | 149       | 107       | 277      | 363        | 0.433      |
|                                      | Uterine cancer                    |                       | 271(15.7)   | 9         | 86        | 176       | 104      | 438        | 0.192                                          | 44        | 128       | 99        | 216      | 326        | 0.399      |
|                                      | COPD                              |                       | 65(3.8)     | 2         | 19        | 44        | 23       | 107        | 0.177                                          | 15        | 27        | 23        | 57       | 73         | 0.438      |
|                                      | Glaucoma                          |                       | 88(5.1)     | 3         | 27        | 58        | 33       | 143        | 0.188                                          | 20        | 32        | 36        | 72       | 104        | 0.409      |
|                                      |                                   |                       |             |           |           |           |          |            | X-squared = 2.4278, df = 5, p-value = 0.7873   |           |           |           |          |            |            |
|                                      |                                   |                       |             |           |           |           |          |            | X-squared = 1.8743, df = 5, p-value = 0.8662   |           |           |           |          |            |            |
| <b>All healthy samples</b>           |                                   | <b>n</b>              | <b>AA</b>   | <b>AC</b> | <b>CC</b> | <b>A</b>  | <b>C</b> | <b>maf</b> | <b>AA</b>                                      | <b>AG</b> | <b>GG</b> | <b>A</b>  | <b>G</b> | <b>maf</b> |            |
|                                      | in GWAS                           | 906                   | 34          | 267       | 605       | 335       | 1477     | 0.185      | 143                                            | 447       | 316       | 733       | 1079     | 0.405      |            |
|                                      | in Replication 2                  | 932                   | 30          | 288       | 614       | 348       | 1516     | 0.187      | 193                                            | 428       | 311       | 814       | 1050     | 0.437      |            |
|                                      | total                             | 1838                  | 64          | 555       | 1219      | 683       | 2993     | 0.186      | 336                                            | 875       | 627       | 1547      | 2129     | 0.421      |            |

**Table S4 266 Gene list used in the network analysis.**

| Gene symbol       | Gene name                                                                                                                    | Disease/Trait                                                             | Data source | Disease/Trait reported by GWAS | Disease/Trait annotated by HGMD                                                                   | Location            | Type                       |
|-------------------|------------------------------------------------------------------------------------------------------------------------------|---------------------------------------------------------------------------|-------------|--------------------------------|---------------------------------------------------------------------------------------------------|---------------------|----------------------------|
| <i>ABCA1</i>      | ATP-binding cassette, sub-family A (ABC1), member 1                                                                          | coronary heart disease, coronary artery disease                           | GWAS, HGMD  | coronary heart disease         | coronary artery disease, coronary heart disease                                                   | plasma membrane     | transporter                |
| <i>ABCC6</i>      | ATP-binding cassette, sub-family C (CFTR/MRP), member 6                                                                      | coronary artery disease                                                   | HGMD        | -                              | coronary artery disease                                                                           | plasma membrane     | transporter                |
| <i>ABCC9</i>      | ATP-binding cassette, sub-family C (CFTR/MRP), member 9                                                                      | myocardial infarction                                                     | HGMD        | -                              | myocardial infarction                                                                             | plasma membrane     | ion channel                |
| <i>ABCG1</i>      | ATP-binding cassette, sub-family G (WHITE), member 1                                                                         | coronary artery disease                                                   | HGMD        | -                              | coronary artery disease                                                                           | plasma membrane     | transporter                |
| <i>ABCG8</i>      | ATP-binding cassette, sub-family G (WHITE), member 8                                                                         | coronary artery disease                                                   | HGMD        | -                              | coronary artery disease                                                                           | plasma membrane     | transporter                |
| <i>ABO</i>        | ABO blood group (transferase A, alpha 1-3-N-acetylgalactosaminyltransferase; transferase B, alpha 1-3-galactosyltransferase) | coronary heart disease, myocardial infarction,                            | GWAS        | coronary heart disease         | -                                                                                                 | plasma membrane     | enzyme                     |
| <i>ACE</i>        | angiotensin I converting enzyme (peptidyl-dipeptidase A) 1                                                                   | coronary artery disease                                                   | HGMD        | -                              | coronary artery disease, coronary heart disease, myocardial infarction                            | plasma membrane     | peptidase                  |
| <i>ACTA2</i>      | actin, alpha 2, smooth muscle, aorta                                                                                         | coronary artery disease                                                   | HGMD        | -                              | coronary artery disease                                                                           | cytoplasm           | other                      |
| <i>ADAMTS7</i>    | ADAM metalloproteinase with thrombospondin type 1 motif, 7                                                                   | coronary heart disease                                                    | GWAS        | coronary heart disease         | -                                                                                                 | extracellular space | peptidase                  |
| <i>ADCY8</i>      | adenylate cyclase 8 (brain)                                                                                                  | myocardial infarction                                                     | HGMD        | -                              | myocardial infarction                                                                             | plasma membrane     | enzyme                     |
| <i>ADD1</i>       | adducin 1 (alpha)                                                                                                            | coronary artery disease, myocardial infarction,                           | HGMD        | -                              | coronary artery disease                                                                           | cytoplasm           | other                      |
| <i>ADIPOQ</i>     | adiponectin, C1Q and collagen domain containing                                                                              | coronary artery disease                                                   | HGMD        | -                              | coronary artery disease, coronary heart disease, myocardial infarction                            | extracellular space | other                      |
| <i>ADORA3</i>     | adenosine A3 receptor                                                                                                        | coronary heart disease                                                    | HGMD        | -                              | coronary heart disease                                                                            | plasma membrane     | G-protein coupled receptor |
| <i>ADRB2</i>      | adrenoceptor beta 2, surface                                                                                                 | myocardial infarction                                                     | HGMD        | -                              | myocardial infarction                                                                             | plasma membrane     | G-protein coupled receptor |
| <i>ADTRP</i>      | androgen-dependent TFPI-regulating protein                                                                                   | coronary heart disease, myocardial infarction,                            | HGMD        | -                              | coronary heart disease, myocardial infarction                                                     | plasma membrane     | other                      |
| <i>AGER</i>       | advanced glycosylation end product-specific receptor                                                                         | coronary artery disease                                                   | HGMD        | -                              | coronary artery disease                                                                           | plasma membrane     | transmembrane receptor     |
| <i>AGT</i>        | angiotensinogen (serpin peptidase inhibitor, clade A, member 8)                                                              | coronary artery disease, coronary heart disease, coronary artery disease, | HGMD        | -                              | coronary artery disease                                                                           | extracellular space | growth factor              |
| <i>ALDH2</i>      | aldehyde dehydrogenase 2 family (mitochondrial)                                                                              | acute coronary syndrome, coronary_artery_disease,                         | GWAS, HGMD  | coronary heart disease         | coronary artery disease, acute coronary syndrome, coronary artery disease, coronary heart disease | cytoplasm           | enzyme                     |
| <i>ALOX15</i>     | arachidonate 15-lipoxygenase                                                                                                 | coronary heart disease                                                    | HGMD        | -                              | coronary artery disease                                                                           | cytoplasm           | enzyme                     |
| <i>ALOX5</i>      | arachidonate 5-lipoxygenase                                                                                                  | coronary artery disease                                                   | HGMD        | -                              | coronary artery disease                                                                           | cytoplasm           | enzyme                     |
| <i>AMPD1</i>      | adenosine monophosphate deaminase 1                                                                                          | coronary artery disease                                                   | HGMD        | -                              | coronary artery disease                                                                           | cytoplasm           | enzyme                     |
| <i>ANKS1A</i>     | ankyrin repeat and sterile alpha motif domain containing 1A                                                                  | coronary heart disease                                                    | GWAS        | coronary heart disease         | -                                                                                                 | cytoplasm           | other                      |
| <i>ANXA5</i>      | annexin A5                                                                                                                   | myocardial infarction                                                     | HGMD        | -                              | myocardial infarction                                                                             | plasma membrane     | other                      |
| <i>AP3D1</i>      | adaptor-related protein complex 3, delta 1 subunit                                                                           | myocardial infarction, coronary heart disease,                            | novel       | myocardial infarction          | -                                                                                                 | cytoplasm           | transporter                |
| <i>APOA1</i>      | apolipoprotein A-I                                                                                                           | coronary artery disease, coronary heart disease,                          | GWAS, HGMD  | coronary heart disease         | coronary artery disease                                                                           | extracellular space | transporter                |
| <i>APOA4</i>      | apolipoprotein A-IV                                                                                                          | coronary heart disease, myocardial infarction,                            | GWAS, HGMD  | coronary heart disease         | coronary heart disease                                                                            | extracellular space | transporter                |
| <i>APOA5</i>      | apolipoprotein A-V                                                                                                           | coronary heart disease, coronary artery disease, coronary_artery_disease, | GWAS, HGMD  | coronary heart disease         | coronary artery disease, myocardial infarction, coronary artery disease, coronary heart disease   | extracellular space | other                      |
| <i>APOB</i>       | apolipoprotein B (including Ag(x) antigen)                                                                                   | coronary heart disease                                                    | HGMD        | -                              | coronary artery disease                                                                           | extracellular space | transporter                |
| <i>APOC3</i>      | apolipoprotein C-III                                                                                                         | coronary heart disease                                                    | GWAS        | coronary heart disease         | -                                                                                                 | extracellular space | transporter                |
| <i>APOE</i>       | apolipoprotein E                                                                                                             | coronary heart disease                                                    | HGMD        | -                              | coronary heart disease                                                                            | extracellular space | transporter                |
| <i>APOM</i>       | apolipoprotein M                                                                                                             | coronary artery disease                                                   | HGMD        | -                              | coronary artery disease                                                                           | plasma membrane     | transporter                |
| <i>ARG1</i>       | arginase, liver                                                                                                              | myocardial infarction                                                     | HGMD        | -                              | myocardial infarction                                                                             | cytoplasm           | enzyme                     |
| <i>ARHGAP9</i>    | Rho GTPase activating protein 9                                                                                              | angina                                                                    | HGMD        | -                              | angina                                                                                            | cytoplasm           | other                      |
| <i>ATP2B1</i>     | ATPase, Ca <sup>++</sup> transporting, plasma membrane 1                                                                     | coronary heart disease                                                    | GWAS        | coronary heart disease         | -                                                                                                 | plasma membrane     | transporter                |
| <i>ATP5G1</i>     | ATP synthase, H <sup>+</sup> transporting, mitochondrial Fo complex, subunit C1 (subunit 9)                                  | coronary heart disease                                                    | GWAS        | coronary heart disease         | -                                                                                                 | cytoplasm           | transporter                |
| <i>BHMT</i>       | betaine--homocysteine S-methyltransferase                                                                                    | coronary artery disease                                                   | HGMD        | -                              | coronary artery disease                                                                           | cytoplasm           | enzyme                     |
| <i>BRAP</i>       | BRCA1 associated protein                                                                                                     | myocardial infarction                                                     | HGMD        | -                              | myocardial infarction                                                                             | cytoplasm           | enzyme                     |
| <i>BTN2A1</i>     | butyrophilin, subfamily 2, member A1                                                                                         | myocardial infarction                                                     | HGMD        | -                              | myocardial infarction                                                                             | plasma membrane     | other                      |
| <i>BTNL2</i>      | butyrophilin-like 2 (MHC class II associated)                                                                                | coronary heart disease                                                    | GWAS        | coronary heart disease         | -                                                                                                 | plasma membrane     | transmembrane receptor     |
| <i>C12orf43</i>   | chromosome 12 open reading frame 43                                                                                          | coronary heart disease                                                    | GWAS        | coronary heart disease         | -                                                                                                 | unknown             | other                      |
| <i>C6orf10</i>    | chromosome 6 open reading frame 10                                                                                           | coronary heart disease                                                    | GWAS        | coronary heart disease         | -                                                                                                 | unknown             | other                      |
| <i>CBS</i>        | cystathionine-beta-synthase                                                                                                  | coronary artery disease                                                   | HGMD        | -                              | coronary artery disease                                                                           | cytoplasm           | enzyme                     |
| <i>CCL2</i>       | chemokine (C-C motif) ligand 2                                                                                               | angina                                                                    | HGMD        | -                              | angina                                                                                            | extracellular space | cytokine                   |
| <i>CCR5</i>       | chemokine (C-C motif) receptor 5 (gene/pseudogene)                                                                           | myocardial infarction, myocardial infarction,                             | HGMD        | -                              | myocardial infarction, coronary artery disease, myocardial infarction                             | plasma membrane     | G-protein coupled receptor |
| <i>CD14</i>       | CD14 molecule                                                                                                                | coronary artery disease                                                   | HGMD        | -                              | infarction                                                                                        | plasma membrane     | transmembrane receptor     |
| <i>CD36</i>       | CD36 molecule (thrombospondin receptor)                                                                                      | coronary artery disease                                                   | HGMD        | -                              | coronary artery disease                                                                           | plasma membrane     | transmembrane receptor     |
| <i>CD40</i>       | CD40 molecule, TNF receptor superfamily member 5                                                                             | acute coronary syndrome                                                   | HGMD        | -                              | acute coronary syndrome                                                                           | plasma membrane     | transmembrane receptor     |
| <i>CDKN1B</i>     | cyclin-dependent kinase inhibitor 1B (p27, Kip1)                                                                             | myocardial infarction                                                     | HGMD        | -                              | myocardial infarction                                                                             | nucleus             | kinase                     |
| <i>CDKN2A</i>     | cyclin-dependent kinase inhibitor 2A                                                                                         | coronary heart disease                                                    | GWAS        | coronary heart disease         | -                                                                                                 | nucleus             | transcription regulator    |
| <i>CDKN2B</i>     | cyclin-dependent kinase inhibitor 2B (p15, inhibits CDK4)                                                                    | coronary heart disease                                                    | GWAS        | coronary heart disease         | -                                                                                                 | nucleus             | transcription regulator    |
| <i>CDKN2B-AS1</i> | CDKN2B antisense RNA 1                                                                                                       | coronary artery disease                                                   | HGMD        | -                              | coronary artery disease                                                                           | unknown             | other                      |
| <i>CELSR2</i>     | cadherin, EGF LAG seven-pass G-type receptor 2 (flamingo homolog, Drosophila)                                                | coronary heart disease                                                    | GWAS        | coronary heart disease         | -                                                                                                 | plasma membrane     | G-protein coupled receptor |
| <i>CETP</i>       | cholesteryl ester transfer protein, plasma                                                                                   | coronary heart disease                                                    | GWAS        | coronary heart disease         | -                                                                                                 | extracellular space | enzyme                     |
| <i>CFH</i>        | complement factor H                                                                                                          | coronary artery disease                                                   | HGMD        | -                              | coronary artery disease                                                                           | extracellular space | other                      |
| <i>CLCN1</i>      | chloride channel, voltage-sensitive 1                                                                                        | angina                                                                    | HGMD        | -                              | angina                                                                                            | plasma membrane     | ion channel                |
| <i>CLU</i>        | clusterin                                                                                                                    | coronary artery disease                                                   | HGMD        | -                              | coronary artery disease                                                                           | extracellular space | other                      |
| <i>CNNM2</i>      | cyclin M2                                                                                                                    | coronary heart disease                                                    | GWAS        | coronary heart disease         | -                                                                                                 | plasma membrane     | other                      |



|                |                                                                   |                          |            |                        |                                         |                     |                            |  |
|----------------|-------------------------------------------------------------------|--------------------------|------------|------------------------|-----------------------------------------|---------------------|----------------------------|--|
| <i>COL4A1</i>  | collagen, type IV, alpha 1                                        | myocardial infarction,   |            |                        |                                         |                     |                            |  |
| <i>COL4A2</i>  | collagen, type IV, alpha 2                                        | coronary heart disease   | GWAS, HGMD | coronary heart disease | myocardial infarction                   | extracellular space | other                      |  |
|                |                                                                   | myocardial infarction,   |            |                        | -                                       | extracellular space | other                      |  |
| <i>CPB2</i>    | carboxypeptidase B2 (plasma)                                      | acute coronary syndrome  | HGMD       | -                      | infarction                              | extracellular space | peptidase                  |  |
|                |                                                                   | myocardial infarction,   |            |                        | coronary artery disease, myocardial     |                     |                            |  |
| <i>CRP</i>     | C-reactive protein, pentraxin-related                             | coronary artery disease  | HGMD       | -                      | infarction                              | extracellular space | other                      |  |
| <i>CSMD1</i>   | CUB and Sushi multiple domains 1                                  | coronary heart disease   | GWAS       | coronary heart disease | -                                       | plasma membrane     | other                      |  |
|                |                                                                   | myocardial infarction,   |            |                        | coronary artery disease, myocardial     |                     |                            |  |
| <i>CX3CR1</i>  | chemokine (C-X3-C motif) receptor 1                               | coronary artery disease  | HGMD       | -                      | infarction                              | plasma membrane     | G-protein coupled receptor |  |
| <i>CXCL12</i>  | chemokine (C-X-C motif) ligand 12                                 | coronary heart disease   | GWAS       | coronary heart disease | -                                       | extracellular space | cytokine                   |  |
| <i>CXCL16</i>  | chemokine (C-X-C motif) ligand 16                                 | coronary heart disease   | HGMD       | -                      | coronary heart disease                  | extracellular space | cytokine                   |  |
|                |                                                                   | myocardial infarction,   |            |                        | coronary artery disease, myocardial     |                     |                            |  |
| <i>CYBA</i>    | cytochrome b-245, alpha polypeptide                               | coronary artery disease  | HGMD       | -                      | infarction                              | cytoplasm           | enzyme                     |  |
| <i>CYP17A1</i> | cytochrome P450, family 17, subfamily A, polypeptide 1            | coronary heart disease   | GWAS       | coronary heart disease | -                                       | cytoplasm           | enzyme                     |  |
| <i>CYP2C19</i> | cytochrome P450, family 2, subfamily C, polypeptide 19            | coronary artery disease  | HGMD       | -                      | coronary artery disease                 | cytoplasm           | enzyme                     |  |
| <i>CYP2C8</i>  | cytochrome P450, family 2, subfamily C, polypeptide 8             | coronary heart disease   | HGMD       | -                      | coronary heart disease                  | cytoplasm           | enzyme                     |  |
| <i>CYP2J2</i>  | cytochrome P450, family 2, subfamily J, polypeptide 2             | coronary artery disease  | HGMD       | -                      | coronary artery disease                 | cytoplasm           | enzyme                     |  |
| <i>CYP3A4</i>  | cytochrome P450, family 3, subfamily A, polypeptide 4             | coronary heart disease   | HGMD       | -                      | coronary heart disease                  | cytoplasm           | enzyme                     |  |
| <i>DNASE1</i>  | deoxyribonuclease I                                               | myocardial infarction    | HGMD       | -                      | myocardial infarction                   | extracellular space | enzyme                     |  |
| <i>DNM2</i>    | dynamain 2                                                        | coronary heart disease   | GWAS       | coronary heart disease | -                                       | plasma membrane     | enzyme                     |  |
| <i>DOCK6</i>   | dedicator of cytokinesis 6                                        | coronary heart disease   | GWAS       | coronary heart disease | -                                       | cytoplasm           | other                      |  |
| <i>DOT1L</i>   | DOT1-like, histone H3 methyltransferase ( <i>S. cerevisiae</i> )  | myocardial infarction    | novel      | myocardial infarction  | -                                       | nucleus             | phosphatase                |  |
| <i>DTNB</i>    | dystrobrevin, beta                                                | coronary heart disease   | GWAS       | coronary heart disease | -                                       | plasma membrane     | other                      |  |
| <i>EDC4</i>    | enhancer of mRNA decapping 4                                      | coronary heart disease   | GWAS       | coronary heart disease | -                                       | cytoplasm           | other                      |  |
| <i>EDN1</i>    | endothelin 1                                                      | angina                   | HGMD       | -                      | angina                                  | extracellular space | cytokine                   |  |
| <i>EDNRA</i>   | endothelin receptor type A                                        | myocardial infarction    | HGMD       | -                      | myocardial infarction                   | plasma membrane     | transmembrane receptor     |  |
| <i>EGFR</i>    | epidermal growth factor receptor                                  | acute coronary syndrome  | HGMD       | -                      | acute coronary syndrome                 | plasma membrane     | kinase                     |  |
| <i>ELANE</i>   | elastase, neutrophil expressed                                    | myocardial infarction    | HGMD       | -                      | myocardial infarction                   | extracellular space | peptidase                  |  |
| <i>ENO1</i>    | enolase 1, (alpha)                                                | myocardial infarction    | HGMD       | -                      | myocardial infarction                   | cytoplasm           | transcription regulator    |  |
| <i>EPHX2</i>   | epoxide hydrolase 2, cytoplasmic                                  | coronary heart disease   | HGMD       | -                      | coronary heart disease                  | cytoplasm           | enzyme                     |  |
| <i>F12</i>     | coagulation factor XII (Hageman factor)                           | myocardial infarction    | HGMD       | -                      | myocardial infarction                   | extracellular space | peptidase                  |  |
|                |                                                                   | myocardial infarction,   |            |                        | coronary artery disease, myocardial     |                     |                            |  |
| <i>F13A1</i>   | coagulation factor XIII, A1 polypeptide                           | coronary artery disease  | HGMD       | -                      | infarction                              | extracellular space | enzyme                     |  |
|                |                                                                   | myocardial infarction,   |            |                        | coronary artery disease, myocardial     |                     |                            |  |
| <i>F13B</i>    | coagulation factor XIII, B polypeptide                            | coronary artery disease  | HGMD       | -                      | infarction                              | cytoplasm           | enzyme                     |  |
| <i>F2R</i>     | coagulation factor II (thrombin) receptor                         | coronary heart disease   | HGMD       | -                      | coronary heart disease                  | plasma membrane     | G-protein coupled receptor |  |
|                |                                                                   | myocardial infarction,   |            |                        | coronary artery disease, myocardial     |                     |                            |  |
| <i>F5</i>      | coagulation factor V (proaccelerin, labile factor)                | coronary artery disease  | HGMD       | -                      | infarction                              | plasma membrane     | enzyme                     |  |
|                |                                                                   | myocardial infarction,   |            |                        | coronary heart disease, myocardial      |                     |                            |  |
| <i>F7</i>      | coagulation factor VII (serum prothrombin conversion accelerator) | coronary heart disease   | HGMD       | -                      | infarction                              | plasma membrane     | peptidase                  |  |
| <i>FABP2</i>   | fatty acid binding protein 2, intestinal                          | myocardial infarction    | HGMD       | -                      | myocardial infarction                   | cytoplasm           | transporter                |  |
| <i>FAS</i>     | Fas (TNF receptor superfamily, member 6)                          | myocardial infarction    | HGMD       | -                      | myocardial infarction                   | plasma membrane     | transmembrane receptor     |  |
| <i>FCAR</i>    | Fc fragment of IgA, receptor for                                  | myocardial infarction    | HGMD       | -                      | myocardial infarction                   | plasma membrane     | other                      |  |
|                |                                                                   | acute coronary syndrome, |            |                        | acute coronary syndrome, coronary heart |                     |                            |  |
| <i>FCGR2A</i>  | Fc fragment of IgG, low affinity IIa, receptor (CD32)             | coronary heart disease   | HGMD       | -                      | disease                                 | plasma membrane     | transmembrane receptor     |  |
| <i>FGB</i>     | fibrinogen beta chain                                             | coronary artery disease  | HGMD       | -                      | coronary artery disease                 | extracellular space | other                      |  |
| <i>FGFR4</i>   | fibroblast growth factor receptor 4                               | coronary artery disease  | HGMD       | -                      | coronary artery disease                 | plasma membrane     | kinase                     |  |
| <i>FHL5</i>    | four and a half LIM domains 5                                     | coronary heart disease   | GWAS       | coronary heart disease | -                                       | nucleus             | transcription regulator    |  |
| <i>FN1</i>     | fibronectin 1                                                     | coronary heart disease   | GWAS       | coronary heart disease | -                                       | extracellular space | enzyme                     |  |
| <i>FNDC1</i>   | fibronectin type III domain containing 1                          | coronary heart disease   | GWAS       | coronary heart disease | -                                       | plasma membrane     | other                      |  |
| <i>FOXC2</i>   | forkhead box C2 (MFH-1, mesenchyme forkhead 1)                    | myocardial infarction    | HGMD       | -                      | myocardial infarction                   | nucleus             | transcription regulator    |  |
| <i>FXN</i>     | frataxin                                                          | myocardial infarction    | HGMD       | -                      | myocardial infarction                   | cytoplasm           | kinase                     |  |
| <i>GAS6</i>    | growth arrest-specific 6                                          | acute coronary syndrome  | HGMD       | -                      | acute coronary syndrome                 | extracellular space | growth factor              |  |
| <i>GATA2</i>   | GATA binding protein 2                                            | coronary artery disease  | HGMD       | -                      | coronary artery disease                 | nucleus             | transcription regulator    |  |
| <i>GCLC</i>    | glutamate-cysteine ligase, catalytic subunit                      | myocardial infarction    | HGMD       | -                      | myocardial infarction                   | cytoplasm           | enzyme                     |  |
| <i>GCLM</i>    | glutamate-cysteine ligase, modifier subunit                       | myocardial infarction    | HGMD       | -                      | myocardial infarction                   | cytoplasm           | enzyme                     |  |
| <i>GCOM1</i>   | GRINL1A complex locus 1                                           | coronary heart disease   | GWAS       | coronary heart disease | -                                       | nucleus             | other                      |  |
| <i>GHRL</i>    | ghrelin/obestatin prepropeptide                                   | coronary artery disease  | HGMD       | -                      | coronary artery disease                 | extracellular space | growth factor              |  |
| <i>GIP</i>     | gastric inhibitory polypeptide                                    | coronary heart disease   | GWAS       | coronary heart disease | -                                       | extracellular space | other                      |  |
|                |                                                                   | myocardial infarction,   |            |                        | coronary artery disease, myocardial     |                     |                            |  |
| <i>GJA4</i>    | gap junction protein, alpha 4, 37kDa                              | coronary artery disease  | HGMD       | -                      | infarction                              | plasma membrane     | transporter                |  |
| <i>GP1BA</i>   | glycoprotein Ib (platelet), alpha polypeptide                     | myocardial infarction    | HGMD       | -                      | myocardial infarction                   | plasma membrane     | other                      |  |
| <i>GP6</i>     | glycoprotein VI (platelet)                                        | myocardial infarction    | HGMD       | -                      | myocardial infarction                   | plasma membrane     | transmembrane receptor     |  |
|                |                                                                   | coronary_artery_disease, |            |                        | coronary artery disease, coronary heart |                     |                            |  |
| <i>GPX1</i>    | glutathione peroxidase 1                                          | coronary heart disease   | HGMD       | -                      | disease                                 | cytoplasm           | enzyme                     |  |
| <i>GUCY1A3</i> | guanylate cyclase 1, soluble, alpha 3                             | coronary heart disease   | GWAS       | coronary heart disease | -                                       | cytoplasm           | enzyme                     |  |
| <i>HCG27</i>   | HLA complex group 27 (non-protein coding)                         | coronary heart disease   | GWAS       | coronary heart disease | -                                       | unknown             | other                      |  |
| <i>HECTD4</i>  | HECT domain containing E3 ubiquitin protein ligase 4              | coronary heart disease   | GWAS       | coronary heart disease | -                                       | unknown             | other                      |  |
| <i>HFE</i>     | hemochromatosis                                                   | coronary heart disease   | HGMD       | -                      | coronary heart disease                  | plasma membrane     | transmembrane receptor     |  |
| <i>HFE2</i>    | hemochromatosis type 2 (juvenile)                                 | coronary heart disease   | GWAS       | coronary heart disease | -                                       | plasma membrane     | other                      |  |
| <i>HHIPL1</i>  | HHIP-like 1                                                       | coronary heart disease   | GWAS       | coronary heart disease | -                                       | unknown             | other                      |  |
| <i>HLA-C</i>   | major histocompatibility complex, class I, C                      | coronary heart disease   | GWAS       | coronary heart disease | -                                       | plasma membrane     | other                      |  |

|                 |                                                                                        |                                                                                 |            |                                     |                                                        |                     |                         |
|-----------------|----------------------------------------------------------------------------------------|---------------------------------------------------------------------------------|------------|-------------------------------------|--------------------------------------------------------|---------------------|-------------------------|
| <i>HLA-DPB2</i> | major histocompatibility complex, class II, DP beta 2 (pseudogene)                     | myocardial infarction                                                           | HGMD       | -                                   | myocardial infarction                                  | unknown             | other                   |
| <i>HLA-DQB1</i> | major histocompatibility complex, class II, DQ beta 1                                  | coronary heart disease                                                          | GWAS       | coronary heart disease              | -                                                      | plasma membrane     | other                   |
| <i>HLA-DRB1</i> | major histocompatibility complex, class II, DR beta 1                                  | coronary heart disease                                                          | GWAS       | coronary heart disease              | -                                                      | plasma membrane     | transmembrane receptor  |
| <i>HLA-DRB5</i> | major histocompatibility complex, class II, DR beta 5                                  | coronary heart disease                                                          | GWAS       | coronary heart disease              | -                                                      | plasma membrane     | transmembrane receptor  |
| <i>HNF1A</i>    | HNF1 homeobox A                                                                        | coronary heart disease                                                          | GWAS       | coronary heart disease              | -                                                      | nucleus             | transcription regulator |
| <i>HSP90B1</i>  | heat shock protein 90kDa beta (Grp94), member 1                                        | coronary heart disease                                                          | GWAS       | coronary heart disease              | -                                                      | cytoplasm           | other                   |
| <i>HSPA1A</i>   | heat shock 70kDa protein 1A                                                            | coronary heart disease                                                          | HGMD       | -                                   | coronary heart disease                                 | cytoplasm           | other                   |
| <i>HSPA8</i>    | heat shock 70kDa protein 8                                                             | coronary heart disease                                                          | HGMD       | -                                   | coronary heart disease                                 | cytoplasm           | enzyme                  |
| <i>ICAM1</i>    | intercellular adhesion molecule 1                                                      | coronary heart disease                                                          | HGMD       | -                                   | coronary heart disease                                 | plasma membrane     | transmembrane receptor  |
| <i>IGF1</i>     | insulin-like growth factor 1 (somatomedin C)                                           | myocardial infarction                                                           | HGMD       | -                                   | myocardial infarction                                  | extracellular space | growth factor           |
| <i>IGSF5</i>    | immunoglobulin superfamily, member 5                                                   | coronary heart disease                                                          | GWAS       | coronary heart disease              | -                                                      | plasma membrane     | other                   |
| <i>IL1B</i>     | interleukin 1, beta                                                                    | myocardial infarction                                                           | HGMD       | -                                   | myocardial infarction                                  | extracellular space | cytokine                |
| <i>IL5</i>      | interleukin 5 (colony-stimulating factor, eosinophil)                                  | coronary artery disease                                                         | HGMD       | -                                   | coronary artery disease                                | extracellular space | cytokine                |
| <i>IL6</i>      | interleukin 6 (interferon, beta 2)                                                     | acute coronary syndrome, coronary heart disease                                 | HGMD       | -                                   | acute coronary syndrome, coronary heart disease        | extracellular space | cytokine                |
| <i>IRF5</i>     | interferon regulatory factor 5                                                         | acute coronary syndrome, myocardial infarction, coronary artery disease, angina | HGMD       | -                                   | acute coronary syndrome                                | nucleus             | transcription regulator |
| <i>ITGA2</i>    | integrin, alpha 2 (CD49B, alpha 2 subunit of VLA-2 receptor)                           | myocardial infarction                                                           | HGMD       | -                                   | coronary artery disease, myocardial infarction, angina | plasma membrane     | other                   |
| <i>ITIH3</i>    | inter-alpha-trypsin inhibitor heavy chain 3                                            | myocardial infarction                                                           | HGMD       | -                                   | myocardial infarction                                  | extracellular space | other                   |
| <i>KCNE2</i>    | potassium voltage-gated channel, Isk-related family, member 2                          | myocardial infarction                                                           | GWAS       | myocardial infarction (early onset) | -                                                      | plasma membrane     | ion channel             |
| <i>KCNH2</i>    | potassium voltage-gated channel, subfamily H (eag-related), member 2                   | coronary artery disease                                                         | HGMD       | -                                   | coronary artery disease                                | plasma membrane     | ion channel             |
| <i>KCNJ11</i>   | potassium inwardly-rectifying channel, subfamily J, member 11                          | myocardial infarction, coronary heart disease                                   | HGMD       | -                                   | coronary heart disease, myocardial infarction          | plasma membrane     | ion channel             |
| <i>KDR</i>      | kinase insert domain receptor (a type III receptor tyrosine kinase)                    | coronary heart disease                                                          | HGMD       | -                                   | coronary heart disease                                 | plasma membrane     | kinase                  |
| <i>KIAA1462</i> | KIAA1462                                                                               | coronary heart disease                                                          | GWAS       | coronary heart disease              | -                                                      | plasma membrane     | other                   |
| <i>KIF6</i>     | kinesin family member 6                                                                | myocardial infarction, coronary heart disease                                   | HGMD       | -                                   | coronary heart disease, myocardial infarction          | nucleus             | other                   |
| <i>KL</i>       | klotho                                                                                 | coronary artery disease                                                         | HGMD       | -                                   | coronary artery disease                                | extracellular space | enzyme                  |
| <i>KLHL29</i>   | kelch-like 29 (Drosophila)                                                             | coronary heart disease                                                          | GWAS       | coronary heart disease              | -                                                      | unknown             | other                   |
| <i>LAMC2</i>    | laminin, gamma 2                                                                       | coronary heart disease                                                          | GWAS       | coronary heart disease              | -                                                      | extracellular space | other                   |
| <i>LCAT</i>     | lecithin-cholesterol acyltransferase                                                   | coronary heart disease                                                          | GWAS       | coronary heart disease              | -                                                      | extracellular space | enzyme                  |
| <i>LDLR</i>     | low density lipoprotein receptor                                                       | coronary artery disease                                                         | GWAS, HGMD | coronary heart disease              | coronary artery disease                                | plasma membrane     | transporter             |
| <i>LGALS2</i>   | lectin, galactoside-binding, soluble, 2                                                | myocardial infarction                                                           | HGMD       | -                                   | myocardial infarction                                  | cytoplasm           | other                   |
| <i>LIPA</i>     | lipase A, lysosomal acid, cholesterol esterase                                         | coronary artery disease                                                         | GWAS, HGMD | coronary heart disease              | coronary artery disease                                | cytoplasm           | enzyme                  |
| <i>LIPC</i>     | lipase, hepatic                                                                        | coronary artery disease                                                         | HGMD       | -                                   | coronary artery disease                                | extracellular space | enzyme                  |
| <i>LIPG</i>     | lipase, endothelial                                                                    | myocardial infarction                                                           | HGMD       | -                                   | myocardial infarction                                  | extracellular space | enzyme                  |
| <i>LMNA</i>     | lamin A/C                                                                              | coronary artery disease                                                         | HGMD       | -                                   | coronary artery disease                                | nucleus             | other                   |
| <i>LPA</i>      | lipoprotein, Lp(a)                                                                     | coronary artery disease                                                         | GWAS, HGMD | coronary heart disease              | coronary artery disease                                | extracellular space | other                   |
| <i>LPAL2</i>    | lipoprotein, Lp(a)-like 2, pseudogene                                                  | coronary heart disease                                                          | GWAS       | coronary heart disease              | -                                                      | unknown             | other                   |
| <i>LPL</i>      | lipoprotein lipase                                                                     | myocardial infarction, coronary heart disease                                   | HGMD       | -                                   | coronary heart disease, myocardial infarction          | cytoplasm           | enzyme                  |
| <i>LRP6</i>     | low density lipoprotein receptor-related protein 6                                     | coronary artery disease                                                         | HGMD       | -                                   | coronary artery disease                                | plasma membrane     | transmembrane receptor  |
| <i>LRP8</i>     | low density lipoprotein receptor-related protein 8, apolipoprotein e receptor          | coronary artery disease                                                         | HGMD       | -                                   | coronary artery disease                                | plasma membrane     | transmembrane receptor  |
| <i>LTA</i>      | lymphotoxin alpha (TNF superfamily, member 1)                                          | myocardial infarction                                                           | HGMD       | -                                   | myocardial infarction                                  | extracellular space | cytokine                |
| <i>MEF2A</i>    | myocyte enhancer factor 2A                                                             | myocardial infarction, coronary artery disease                                  | HGMD       | -                                   | coronary artery disease, myocardial infarction         | nucleus             | transcription regulator |
| <i>MIA3</i>     | melanoma inhibitory activity family, member 3                                          | coronary artery disease                                                         | GWAS, HGMD | coronary heart disease              | myocardial infarction                                  | cytoplasm           | other                   |
| <i>MIAT</i>     | myocardial infarction associated transcript (non-protein coding)                       | myocardial infarction                                                           | HGMD       | -                                   | myocardial infarction                                  | unknown             | other                   |
| <i>MIR196A2</i> | microRNA 196b                                                                          | coronary artery disease                                                         | HGMD       | -                                   | coronary artery disease                                | cytoplasm           | microRNA                |
| <i>MIR499</i>   | microRNA 499b                                                                          | coronary artery disease                                                         | HGMD       | -                                   | coronary artery disease                                | cytoplasm           | microRNA                |
| <i>MKL1</i>     | megakaryoblastic leukemia (translocation) 1                                            | coronary artery disease                                                         | HGMD       | -                                   | coronary artery disease                                | nucleus             | transcription regulator |
| <i>MLXIPL</i>   | MLX interacting protein-like                                                           | coronary artery disease                                                         | HGMD       | -                                   | coronary artery disease                                | nucleus             | transcription regulator |
| <i>MMP3</i>     | matrix metalloproteinase 3 (stromelysin 1, progelatinase)                              | myocardial infarction                                                           | HGMD       | -                                   | myocardial infarction                                  | extracellular space | peptidase               |
| <i>MMP9</i>     | matrix metalloproteinase 9 (gelatinase B, 92kDa gelatinase, 92kDa type IV collagenase) | myocardial infarction, coronary artery disease                                  | HGMD       | -                                   | coronary artery disease, myocardial infarction         | extracellular space | peptidase               |
| <i>MORF4L1</i>  | mortality factor 4 like 1                                                              | coronary heart disease                                                          | GWAS       | coronary heart disease              | -                                                      | nucleus             | other                   |
| <i>MRAS</i>     | muscle RAS oncogene homolog                                                            | coronary heart disease                                                          | GWAS       | coronary heart disease              | -                                                      | plasma membrane     | enzyme                  |
| <i>MRPS6</i>    | mitochondrial ribosomal protein S6                                                     | coronary heart disease                                                          | GWAS       | coronary heart disease              | -                                                      | cytoplasm           | other                   |
| <i>MTAP</i>     | methylthioadenosine phosphorylase                                                      | coronary heart disease                                                          | GWAS       | coronary heart disease              | -                                                      | nucleus             | enzyme                  |
| <i>MTHFD1L</i>  | methylenetetrahydrofolate dehydrogenase (NADP+ dependent) 1-like                       | coronary heart disease                                                          | GWAS       | coronary heart disease              | -                                                      | cytoplasm           | enzyme                  |
| <i>MTHFR</i>    | methylenetetrahydrofolate reductase (NAD(P)H)                                          | coronary_artery_disease, coronary heart disease                                 | HGMD       | -                                   | coronary artery disease, coronary heart disease        | cytoplasm           | enzyme                  |
| <i>MTR</i>      | 5-methyltetrahydrofolate-homocysteine methyltransferase                                | coronary artery disease                                                         | HGMD       | -                                   | coronary artery disease                                | cytoplasm           | enzyme                  |
| <i>MTRR</i>     | 5-methyltetrahydrofolate-homocysteine methyltransferase reductase                      | coronary_artery_disease, coronary heart disease                                 | HGMD       | -                                   | coronary artery disease, coronary heart disease        | cytoplasm           | enzyme                  |
| <i>MYH15</i>    | myosin, heavy chain 15                                                                 | coronary heart disease                                                          | HGMD       | -                                   | coronary heart disease                                 | extracellular space | other                   |
| <i>NAMPT</i>    | nicotinamide phosphoribosyltransferase                                                 | coronary artery disease                                                         | HGMD       | -                                   | coronary artery disease                                | extracellular space | cytokine                |
| <i>NFKB1</i>    | nuclear factor of kappa light polypeptide gene enhancer in B-cells 1                   | myocardial infarction, coronary heart disease                                   | HGMD       | -                                   | coronary heart disease, myocardial infarction          | nucleus             | transcription regulator |

|                 |                                                                                                                                                                   |                                                                               |            |                                     |                                                                            |                     |                                   |
|-----------------|-------------------------------------------------------------------------------------------------------------------------------------------------------------------|-------------------------------------------------------------------------------|------------|-------------------------------------|----------------------------------------------------------------------------|---------------------|-----------------------------------|
| <i>NOD2</i>     | nucleotide-binding oligomerization domain containing 2                                                                                                            | coronary artery disease<br>myocardial infarction,                             | HGMD       | -                                   | coronary artery disease<br>coronary artery disease, myocardial             | cytoplasm           | other                             |
| <i>NOS3</i>     | nitric oxide synthase 3 (endothelial cell)                                                                                                                        | coronary artery disease                                                       | HGMD       | -                                   | infarction                                                                 | cytoplasm           | enzyme                            |
| <i>NPY</i>      | neuropeptide Y                                                                                                                                                    | coronary artery disease                                                       | HGMD       | -                                   | coronary artery disease                                                    | extracellular space | other                             |
| <i>NR1H3</i>    | nuclear receptor subfamily 1, group H, member 3                                                                                                                   | coronary heart disease                                                        | HGMD       | -                                   | coronary heart disease                                                     | nucleus             | ligand-dependent nuclear receptor |
| <i>NR3C2</i>    | nuclear receptor subfamily 3, group C, member 2                                                                                                                   | myocardial infarction                                                         | HGMD       | -                                   | myocardial infarction                                                      | nucleus             | ligand-dependent nuclear receptor |
| <i>NT5C2</i>    | 5'-nucleotidase, cytosolic II                                                                                                                                     | coronary heart disease                                                        | GWAS       | coronary heart disease              | -                                                                          | cytoplasm           | phosphatase                       |
| <i>OAZ1</i>     | ornithine decarboxylase antizyme 1                                                                                                                                | coronary heart disease                                                        | HGMD       | -                                   | coronary heart disease                                                     | cytoplasm           | enzyme                            |
| <i>OGG1</i>     | 8-oxoguanine DNA glycosylase                                                                                                                                      | coronary artery disease                                                       | HGMD       | -                                   | coronary artery disease                                                    | nucleus             | enzyme                            |
| <i>OLR1</i>     | oxidized low density lipoprotein (lectin-like) receptor 1                                                                                                         | myocardial infarction,<br>coronary artery disease,<br>acute coronary syndrome | HGMD       | -                                   | coronary artery disease, acute coronary<br>syndrome, myocardial infarction | plasma membrane     | transmembrane receptor            |
| <i>OPRM1</i>    | opioid receptor, mu 1                                                                                                                                             | coronary heart disease                                                        | GWAS       | coronary heart disease              | -                                                                          | plasma membrane     | G-protein coupled receptor        |
| <i>OR13G1</i>   | olfactory receptor, family 13, subfamily G, member 1                                                                                                              | myocardial infarction                                                         | HGMD       | -                                   | myocardial infarction                                                      | plasma membrane     | G-protein coupled receptor        |
| <i>PALLD</i>    | palladin, cytoskeletal associated protein                                                                                                                         | myocardial infarction                                                         | HGMD       | -                                   | myocardial infarction                                                      | cytoplasm           | other                             |
| <i>PCSK9</i>    | proprotein convertase subtilisin/kexin type 9                                                                                                                     | coronary heart disease                                                        | GWAS, HGMD | coronary heart disease              | coronary heart disease                                                     | extracellular space | peptidase                         |
| <i>PDGFD</i>    | platelet derived growth factor D                                                                                                                                  | coronary heart disease                                                        | GWAS       | coronary heart disease              | -                                                                          | extracellular space | growth factor                     |
| <i>PDX1</i>     | pancreatic and duodenal homeobox 1                                                                                                                                | myocardial infarction                                                         | HGMD       | -                                   | myocardial infarction                                                      | nucleus             | transcription regulator           |
| <i>PECAM1</i>   | platelet/endothelial cell adhesion molecule 1                                                                                                                     | coronary artery disease                                                       | HGMD       | -                                   | coronary artery disease                                                    | plasma membrane     | other                             |
| <i>PEMT</i>     | phosphatidylethanolamine N-methyltransferase                                                                                                                      | coronary heart disease                                                        | GWAS       | coronary heart disease              | -                                                                          | cytoplasm           | enzyme                            |
| <i>PHACTR1</i>  | phosphatase and actin regulator 1                                                                                                                                 | myocardial infarction                                                         | GWAS       | Myocardial infarction (early onset) | -                                                                          | cytoplasm           | other                             |
| <i>PLA2G7</i>   | phospholipase A2, group VII (platelet-activating factor acetylhydrolase, plasma)                                                                                  | coronary artery disease                                                       | HGMD       | -                                   | coronary artery disease, coronary heart<br>disease, myocardial infarction  | extracellular space | enzyme                            |
| <i>PLCL2</i>    | phospholipase C-like 2                                                                                                                                            | myocardial infarction                                                         | novel      | myocardial infarction               | -                                                                          | cytoplasm           | enzyme                            |
| <i>PLEKHO2</i>  | pleckstrin homology domain containing, family O member 2                                                                                                          | coronary heart disease<br>myocardial infarction,                              | GWAS       | coronary heart disease              | -                                                                          | cytoplasm           | other                             |
| <i>PON1</i>     | paraoxonase 1                                                                                                                                                     | coronary artery disease<br>myocardial infarction,                             | HGMD       | -                                   | coronary artery disease, coronary heart<br>disease, myocardial infarction  | extracellular space | phosphatase                       |
| <i>PON2</i>     | paraoxonase 2                                                                                                                                                     | coronary artery disease                                                       | HGMD       | -                                   | infarction                                                                 | plasma membrane     | enzyme                            |
| <i>PPAP2B</i>   | phosphatidic acid phosphatase type 2B                                                                                                                             | coronary heart disease                                                        | GWAS       | coronary heart disease              | -                                                                          | plasma membrane     | phosphatase                       |
| <i>PPARD</i>    | peroxisome proliferator-activated receptor delta                                                                                                                  | coronary heart disease                                                        | HGMD       | -                                   | coronary heart disease                                                     | nucleus             | ligand-dependent nuclear receptor |
| <i>PPARG</i>    | peroxisome proliferator-activated receptor gamma                                                                                                                  | coronary heart disease                                                        | HGMD       | -                                   | coronary heart disease                                                     | nucleus             | ligand-dependent nuclear receptor |
| <i>PPP1R3B</i>  | protein phosphatase 1, regulatory subunit 3B                                                                                                                      | coronary heart disease                                                        | GWAS       | coronary heart disease              | -                                                                          | cytoplasm           | other                             |
| <i>PROCR</i>    | protein C receptor, endothelial                                                                                                                                   | myocardial infarction                                                         | HGMD       | -                                   | myocardial infarction                                                      | plasma membrane     | other                             |
| <i>PROZ</i>     | protein Z, vitamin K-dependent plasma glycoprotein                                                                                                                | myocardial infarction                                                         | HGMD       | -                                   | myocardial infarction                                                      | extracellular space | peptidase                         |
| <i>PSMA6</i>    | proteasome (prosome, macropain) subunit, alpha type, 6                                                                                                            | myocardial infarction                                                         | HGMD       | -                                   | myocardial infarction                                                      | cytoplasm           | peptidase                         |
| <i>PSRC1</i>    | proline/serine-rich coiled-coil 1                                                                                                                                 | coronary heart disease                                                        | GWAS       | coronary heart disease              | -                                                                          | cytoplasm           | other                             |
| <i>PTGS1</i>    | prostaglandin-endoperoxide synthase 1 (prostaglandin G/H synthase and<br>prostaglandin-endoperoxide synthase 2 (prostaglandin G/H synthase and<br>cyclooxygenase) | myocardial infarction,<br>acute coronary syndrome                             | HGMD       | -                                   | myocardial infarction<br>acute coronary syndrome, myocardial<br>infarction | cytoplasm           | enzyme                            |
| <i>PTGS2</i>    | cyclooxygenase)                                                                                                                                                   | coronary heart disease                                                        | GWAS       | coronary heart disease              | -                                                                          | cytoplasm           | enzyme                            |
| <i>RASD1</i>    | RAS, dexamethasone-induced 1                                                                                                                                      | coronary heart disease                                                        | GWAS       | coronary heart disease              | -                                                                          | cytoplasm           | enzyme                            |
| <i>RNF130</i>   | ring finger protein 130                                                                                                                                           | coronary heart disease                                                        | GWAS       | coronary heart disease              | -                                                                          | cytoplasm           | peptidase                         |
| <i>ROS1</i>     | c-ros oncogene 1, receptor tyrosine kinase                                                                                                                        | myocardial infarction<br>myocardial infarction,                               | HGMD       | -                                   | myocardial infarction<br>coronary artery disease, myocardial<br>infarction | plasma membrane     | kinase                            |
| <i>SCN5A</i>    | sodium channel, voltage-gated, type V, alpha subunit                                                                                                              | coronary artery disease                                                       | HGMD       | -                                   | infarction                                                                 | plasma membrane     | ion channel                       |
| <i>SELL</i>     | selectin L                                                                                                                                                        | coronary heart disease<br>myocardial infarction,                              | HGMD       | -                                   | coronary heart disease<br>coronary heart disease, myocardial<br>infarction | plasma membrane     | other                             |
| <i>SELP</i>     | selectin P (granule membrane protein 140kDa, antigen CD62)                                                                                                        | coronary heart disease                                                        | HGMD       | -                                   | infarction                                                                 | plasma membrane     | other                             |
| <i>SELPLG</i>   | selectin P ligand                                                                                                                                                 | coronary heart disease                                                        | HGMD       | -                                   | coronary heart disease                                                     | plasma membrane     | other                             |
| <i>SERPINC1</i> | serpin peptidase inhibitor, clade C (antithrombin), member 1                                                                                                      | myocardial infarction                                                         | HGMD       | -                                   | myocardial infarction                                                      | extracellular space | other                             |
| <i>SERPINE1</i> | serpin peptidase inhibitor, clade E (nexin, plasminogen activator inhibitor type 1),                                                                              | myocardial infarction                                                         | HGMD       | -                                   | myocardial infarction                                                      | extracellular space | other                             |
| <i>SF3A2</i>    | splicing factor 3a, subunit2, 66kDa                                                                                                                               | myocardial infarction                                                         | novel      | myocardial infarction               | -                                                                          | nucleus             | other                             |
| <i>SH2B3</i>    | SH2B adaptor protein 3                                                                                                                                            | coronary heart disease                                                        | GWAS, HGMD | coronary heart disease              | myocardial infarction                                                      | cytoplasm           | other                             |
| <i>SIRT1</i>    | sirtuin 1                                                                                                                                                         | myocardial infarction                                                         | HGMD       | -                                   | myocardial infarction                                                      | nucleus             | transcription regulator           |
| <i>SLC12A9</i>  | solute carrier family 12 (potassium/chloride transporters), member 9                                                                                              | coronary heart disease                                                        | GWAS       | coronary heart disease              | -                                                                          | plasma membrane     | transporter                       |
| <i>SLC22A3</i>  | solute carrier family 22 (extraneuronal monoamine transporter), member 3                                                                                          | coronary heart disease                                                        | GWAS       | coronary heart disease              | -                                                                          | plasma membrane     | transporter                       |
| <i>SLC30A1</i>  | solute carrier family 30 (zinc transporter), member 1                                                                                                             | coronary heart disease                                                        | GWAS       | coronary heart disease              | -                                                                          | plasma membrane     | transporter                       |
| <i>SLC5A3</i>   | solute carrier family 5 (sodium/myo-inositol cotransporter), member 3                                                                                             | myocardial infarction                                                         | GWAS       | Myocardial infarction (early onset) | -                                                                          | plasma membrane     | transporter                       |
| <i>SLC6A4</i>   | solute carrier family 6 (neurotransmitter transporter, serotonin), member 4                                                                                       | myocardial infarction                                                         | HGMD       | -                                   | myocardial infarction                                                      | plasma membrane     | transporter                       |
| <i>SMAD3</i>    | SMAD family member 3<br>SWI/SNF related, matrix associated, actin dependent regulator of chromatin,<br>subfamily a, member 4                                      | coronary heart disease                                                        | GWAS       | coronary heart disease              | -                                                                          | nucleus             | transcription regulator           |
| <i>SMARCA4</i>  | SMARCA4                                                                                                                                                           | coronary heart disease                                                        | GWAS       | coronary heart disease              | -                                                                          | nucleus             | transcription regulator           |
| <i>SMCR3</i>    | Smith-Magenis syndrome chromosome region, candidate 3                                                                                                             | coronary heart disease                                                        | GWAS       | coronary heart disease              | -                                                                          | -                   | -                                 |
| <i>SMG6</i>     | smg-6 homolog, nonsense mediated mRNA decay factor (C. elegans)                                                                                                   | coronary heart disease                                                        | GWAS       | coronary heart disease              | -                                                                          | nucleus             | enzyme                            |
| <i>SNF8</i>     | SNF8, ESCRT-II complex subunit, homolog (S. cerevisiae)                                                                                                           | coronary heart disease                                                        | GWAS       | coronary heart disease              | -                                                                          | cytoplasm           | enzyme                            |
| <i>SNX19</i>    | sorting nexin 19                                                                                                                                                  | coronary heart disease                                                        | HGMD       | -                                   | coronary heart disease                                                     | cytoplasm           | transporter                       |
| <i>SORT1</i>    | sortilin 1                                                                                                                                                        | myocardial infarction                                                         | GWAS, HGMD | Myocardial infarction (early onset) | myocardial infarction                                                      | plasma membrane     | transmembrane receptor            |
| <i>SRR</i>      | serine racemase                                                                                                                                                   | coronary heart disease                                                        | GWAS       | coronary heart disease              | -                                                                          | cytoplasm           | enzyme                            |
| <i>STK32B</i>   | serine/threonine kinase 32B                                                                                                                                       | coronary heart disease                                                        | GWAS       | coronary heart disease              | -                                                                          | unknown             | kinase                            |
| <i>SUMO4</i>    | SMT3 suppressor of mif two 3 homolog 4 (S. cerevisiae)                                                                                                            | coronary heart disease                                                        | HGMD       | -                                   | coronary heart disease                                                     | unknown             | other                             |
| <i>TAS2R50</i>  | taste receptor, type 2, member 50                                                                                                                                 | myocardial infarction                                                         | HGMD       | -                                   | myocardial infarction                                                      | unknown             | other                             |
| <i>TBXAS1</i>   | thromboxane A synthase 1 (platelet)                                                                                                                               | myocardial infarction                                                         | HGMD       | -                                   | myocardial infarction                                                      | plasma membrane     | enzyme                            |

|                  |                                                                    |                         |      |                        |                         |                     |                         |
|------------------|--------------------------------------------------------------------|-------------------------|------|------------------------|-------------------------|---------------------|-------------------------|
| <i>TCF21</i>     | transcription factor 21                                            | coronary heart disease  | GWAS | coronary heart disease | -                       | nucleus             | transcription regulator |
| <i>TCF7L2</i>    | transcription factor 7-like 2 (T-cell specific, HMG-box)           | coronary heart disease  | GWAS | coronary heart disease | -                       | nucleus             | transcription regulator |
| <i>TERT</i>      | telomerase reverse transcriptase                                   | coronary artery disease | HGMD | -                      | coronary artery disease | nucleus             | enzyme                  |
| <i>TGFB1</i>     | transforming growth factor, beta 1                                 | myocardial infarction   | HGMD | -                      | myocardial infarction   | extracellular space | growth factor           |
| <i>THBD</i>      | thrombomodulin                                                     | myocardial infarction   | HGMD | -                      | myocardial infarction   | plasma membrane     | transmembrane receptor  |
| <i>THBS1</i>     | thrombospondin 1                                                   | coronary artery disease | HGMD | -                      | coronary artery disease | extracellular space | other                   |
| <i>THBS2</i>     | thrombospondin 2                                                   | myocardial infarction   | HGMD | -                      | myocardial infarction   | extracellular space | other                   |
| <i>THBS4</i>     | thrombospondin 4                                                   | myocardial infarction   | HGMD | -                      | myocardial infarction   | extracellular space | other                   |
| <i>THPO</i>      | thrombopoietin                                                     | myocardial infarction   | HGMD | -                      | myocardial infarction   | extracellular space | cytokine                |
| <i>TNF</i>       | tumor necrosis factor                                              | myocardial infarction   | HGMD | -                      | myocardial infarction   | extracellular space | cytokine                |
| <i>TNFRSF11B</i> | tumor necrosis factor receptor superfamily, member 11b             | coronary artery disease | HGMD | -                      | coronary artery disease | plasma membrane     | transmembrane receptor  |
| <i>TNFRSF1B</i>  | tumor necrosis factor receptor superfamily, member 1B              | coronary artery disease | HGMD | -                      | coronary artery disease | plasma membrane     | transmembrane receptor  |
| <i>TNFRSF4</i>   | tumor necrosis factor receptor superfamily, member 4               | myocardial infarction   | HGMD | -                      | myocardial infarction   | plasma membrane     | transmembrane receptor  |
| <i>TNFSF4</i>    | tumor necrosis factor (ligand) superfamily, member 4               | myocardial infarction   | HGMD | -                      | myocardial infarction   | extracellular space | cytokine                |
| <i>TNIK</i>      | TRAF2 and NCK interacting kinase                                   | coronary heart disease  | GWAS | coronary heart disease | -                       | cytoplasm           | kinase                  |
| <i>TRIB1</i>     | tribbles homolog 1 (Drosophila)                                    | coronary artery disease | HGMD | -                      | coronary artery disease | cytoplasm           | kinase                  |
| <i>TRPC4</i>     | transient receptor potential cation channel, subfamily C, member 4 | myocardial infarction   | HGMD | -                      | myocardial infarction   | plasma membrane     | ion channel             |
| <i>TTC32</i>     | tetratricopeptide repeat domain 32                                 | coronary heart disease  | GWAS | coronary heart disease | -                       | unknown             | other                   |
| <i>UBE2Z</i>     | ubiquitin-conjugating enzyme E2Z                                   | coronary heart disease  | GWAS | coronary heart disease | -                       | unknown             | other                   |
| <i>UTS2</i>      | urotensin 2                                                        | myocardial infarction   | HGMD | -                      | myocardial infarction   | extracellular space | other                   |
| <i>VEGFA</i>     | vascular endothelial growth factor A                               | coronary heart disease  | GWAS | coronary heart disease | -                       | extracellular space | growth factor           |
| <i>WDR12</i>     | WD repeat domain 12                                                | coronary heart disease  | GWAS | coronary heart disease | -                       | cytoplasm           | other                   |
| <i>WDR35</i>     | WD repeat domain 35                                                | coronary heart disease  | GWAS | coronary heart disease | -                       | cytoplasm           | other                   |
| <i>ZC3HC1</i>    | zinc finger, C3HC-type containing 1                                | coronary heart disease  | GWAS | coronary heart disease | -                       | nucleus             | other                   |
| <i>ZFHX3</i>     | zinc finger homeobox 3                                             | coronary heart disease  | GWAS | coronary heart disease | -                       | nucleus             | transcription regulator |
| <i>ZNF259</i>    | zinc finger protein 259                                            | coronary heart disease  | GWAS | coronary heart disease | -                       | nucleus             | other                   |
| <i>ZNF627</i>    | zinc finger protein 627                                            | myocardial infarction   | HGMD | -                      | myocardial infarction   | unknown             | other                   |
