# Supplementary material
Source: PubMed Central journal article supplement (PMC4326706)
Supplement: ejhg2014110x5.pdf [file ejhg2014110x5.pdf]

## REFERENCES

1.

Myocardial Infarction Genetics Consortium: Genome-wide association of early-onset myocardial infarction with single nucleotide polymorphisms and copy number variants. *Nat Genet* 2009; **41**: 334-341.

2.

Schunkert H, König IR, Kathiresan S *et al*: Large-scale association analysis identifies 13 new susceptibility loci for coronary artery disease. *Nat Genet* 2011; **43**: 333-338.

3.

CARDIoGRAMplusC4D Consortium: Large-scale association analysis identifies new risk loci for coronary artery disease. *Nat Genet* 2013; **45**: 25-33.

4.

Samani NJ, Erdmann J, Hall AS *et al*: Genomewide association analysis of coronary artery disease. *N Engl J Med* 2007; **357**: 443-453.

5.

Lu X, Wang L, Chen S *et al*: Genome-wide association study in Han Chinese identifies four new susceptibility loci for coronary artery disease. *Nat Genet*

2012; **44**: 890-894.

6.

Erdmann J, Grosshennig A, Braund PS *et al*: New susceptibility locus for coronary artery disease on chromosome 3q22.3. *Nat Genet* 2009; **41**: 280-282.

7.

Aoki A, Ozaki K, Sato H *et al*: SNPs on chromosome 5p15.3 associated with myocardial infarction in Japanese population. *J Hum Genet* 2011; **56**: 47-51.

8.

Wang F, Xu CQ, He Q *et al*: Genome-wide association identifies a susceptibility locus for coronary artery disease in the Chinese Han population. *Nat Genet* 2011; **43**: 345-349.

9.

Davies RW, Wells GA, Stewart AF *et al*: A genome-wide association study for coronary artery disease identifies a novel susceptibility locus in the major histocompatibility complex. *Circ Cardiovasc Genet* 2012; **5**: 217-225.

10.

Takeuchi F, Yokota M, Yamamoto K *et al*: Genome-wide association study of coronary artery disease in the Japanese. *Eur J Hum Genet* 2012; **20**: 333-340.

11.

Barbalic M, Reiner AP, Wu C *et al*: Genome-wide association analysis of incident coronary heart disease (CHD) in African Americans: a short report.

*PLoS Genet* 2011; **7**: e1002199.

12.

Coronary Artery Disease (C4D) Genetics Consortium: A genome-wide association study in Europeans and South Asians identifies five new loci for coronary artery disease. *Nat Genet* 2011; **43**: 339-344.

13.

Wild PS, Zeller T, Schillert A *et al*: A genome-wide association study identifies LIPA as a susceptibility gene for coronary artery disease. *Circ Cardiovasc Genet* 2011; **4**: 403-412.

14.

Gudbjartsson DF, Bjornsdottir US, Halapi E *et al*: Sequence variants affecting eosinophil numbers associate with asthma and myocardial infarction. *Nat Genet* 2009; **41**: 342-347.
